# Supplementary material for: ERK Signaling Pathway Is Constitutively Active in NT2D1 Non-Seminoma Cells and Its Inhibition Impairs Basal and HGF-Activated Cell Proliferation
Source: MDPI journal article supplement (doi:10.3390/biomedicines11071894), 2023-07-04
Supplement: s1 [file s1]

Figure S.1. UO126 dose response experiment.

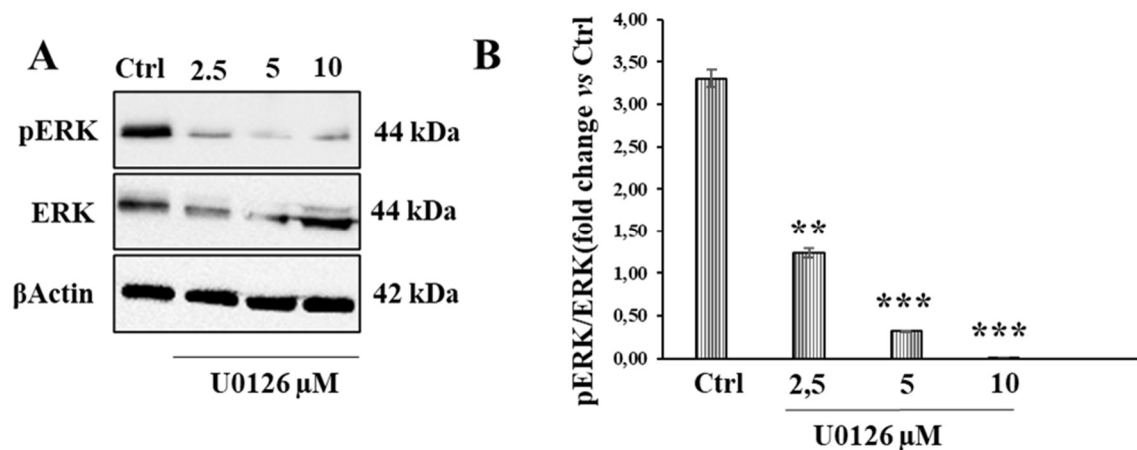

**Figure S.1.** (A) Western Blot analyses of phospho- and total ERK1/2 performed on cells cultured in basal condition and 30 minutes after UO126 administration UO126 (2.5, 5, 10  $\mu$ M). (B) Graphical representation of densitometric analyses of the bands (2.5  $\mu$ M) \*\* *vs* CTRL  $p \leq 0.01$ . (5,10  $\mu$ M) \*\*\* *vs* CTRL  $p \leq 0.001$ . Results were expressed in fold change, with the control considered as 1 ( $\pm$ standard error of the mean (S.E.M)).
