# Supplementary material for: ERK Signaling Pathway Is Constitutively Active in NT2D1 Non-Seminoma Cells and Its Inhibition Impairs Basal and HGF-Activated Cell Proliferation
Source: MDPI journal article supplement (doi:10.3390/biomedicines11071894), 2023-07-04
Supplement: s1 [file s1]

Figure S.3.A. Whole western blots.

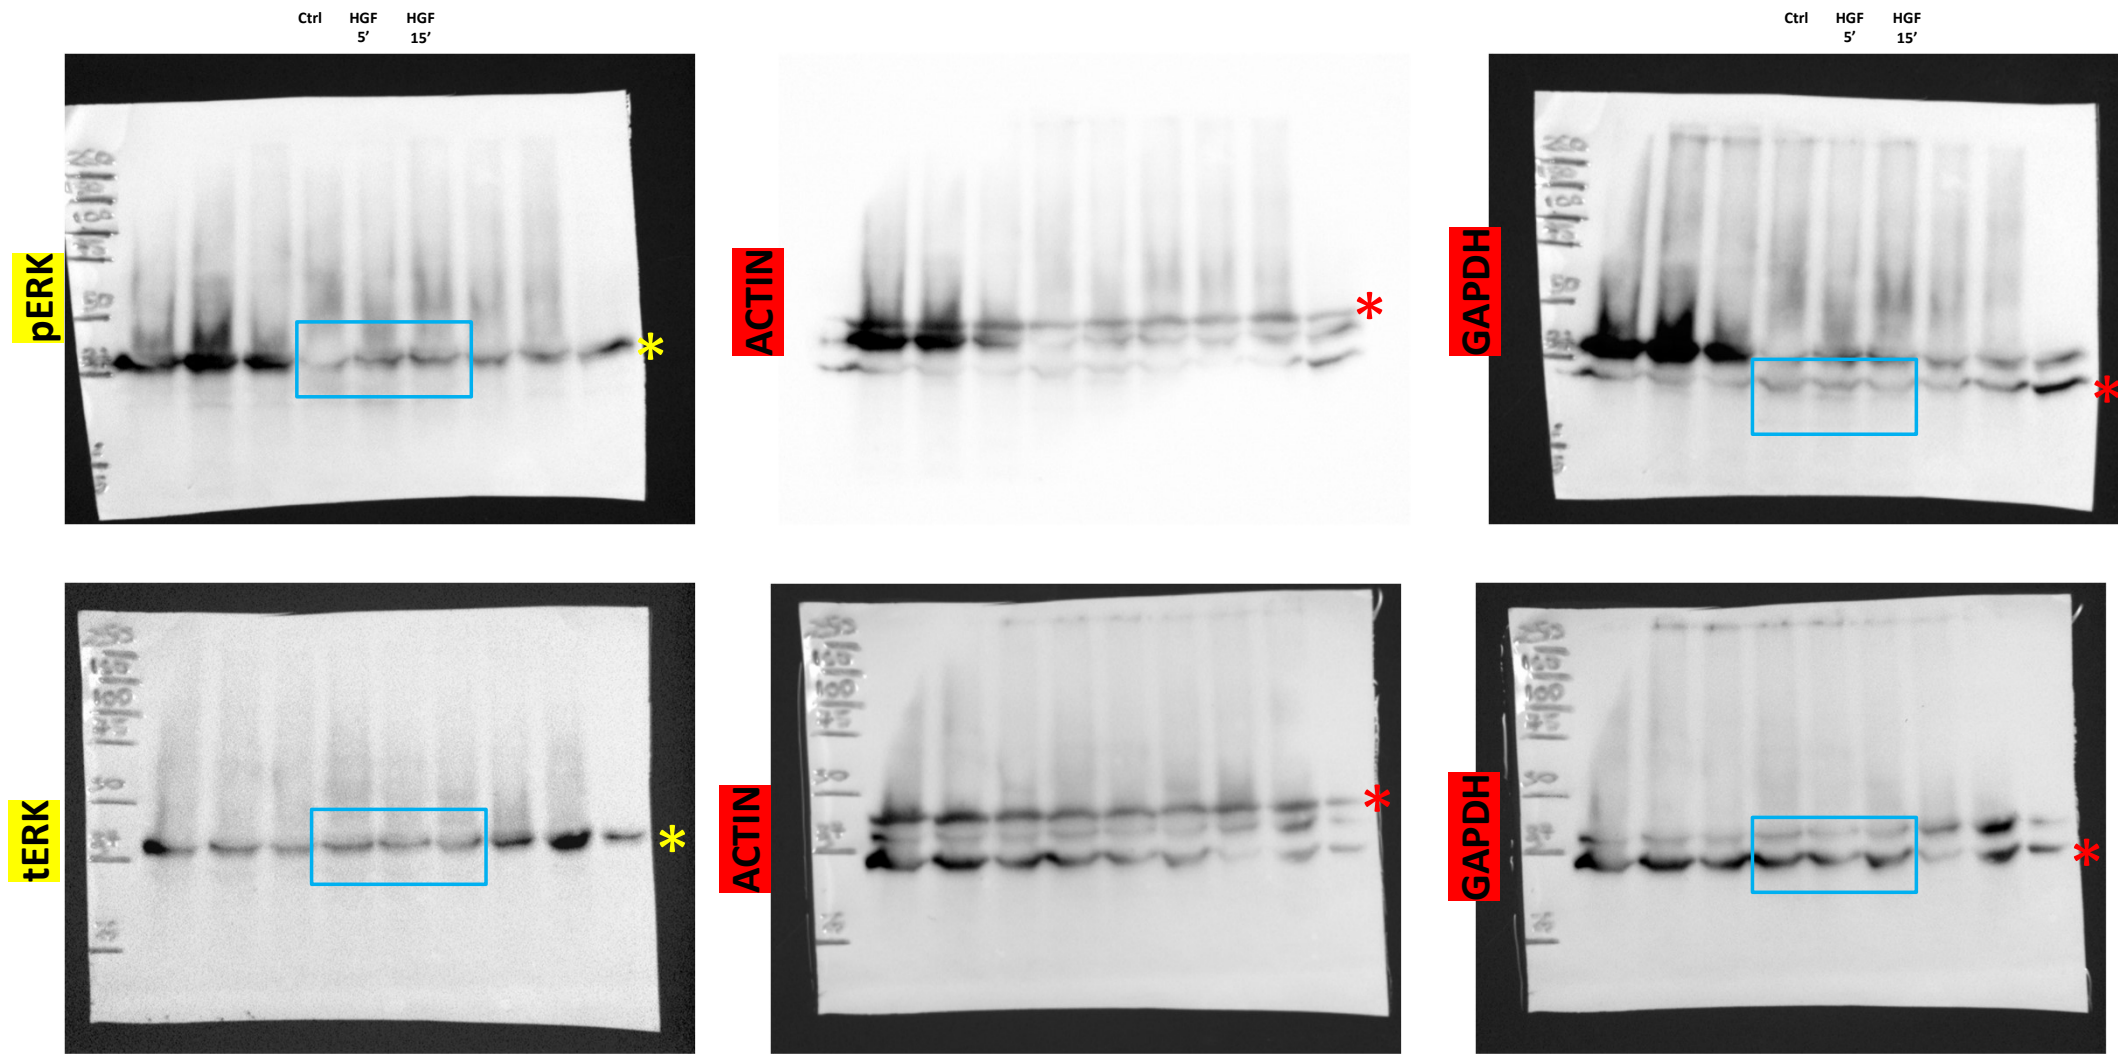

Blue boxes indicate WB lines selected  
for figures included in the paper.  
FIGURE 1A

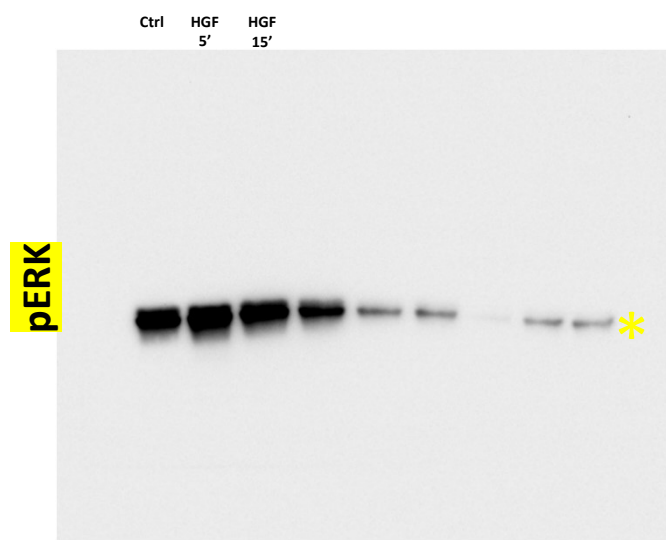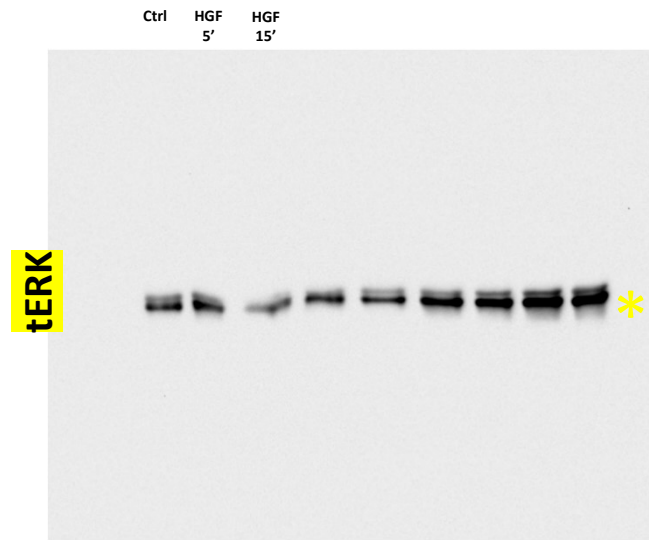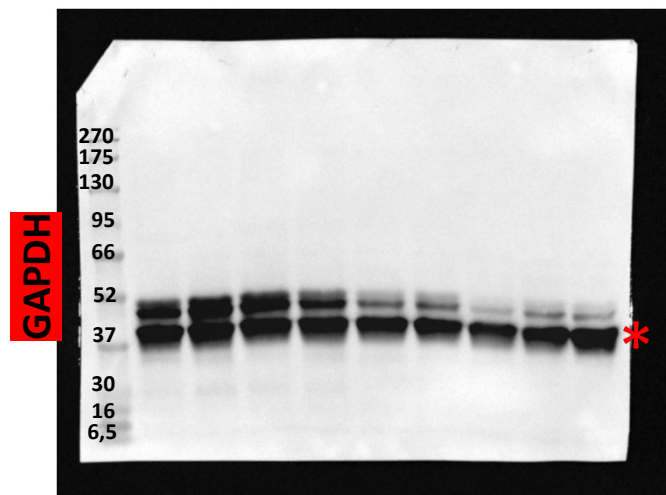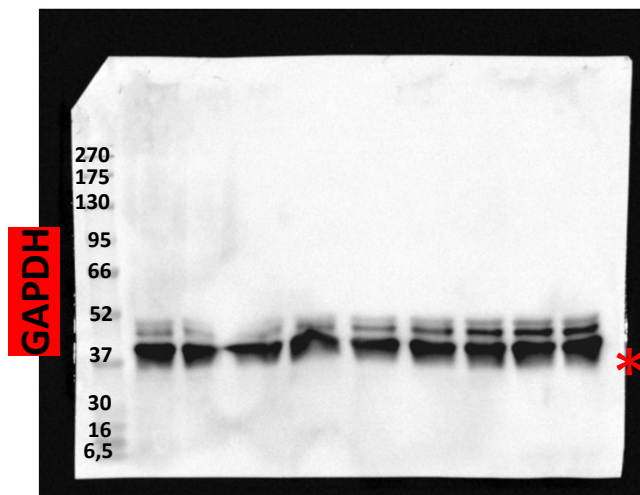

*These blots are relative to results presented in FIGURE 1*

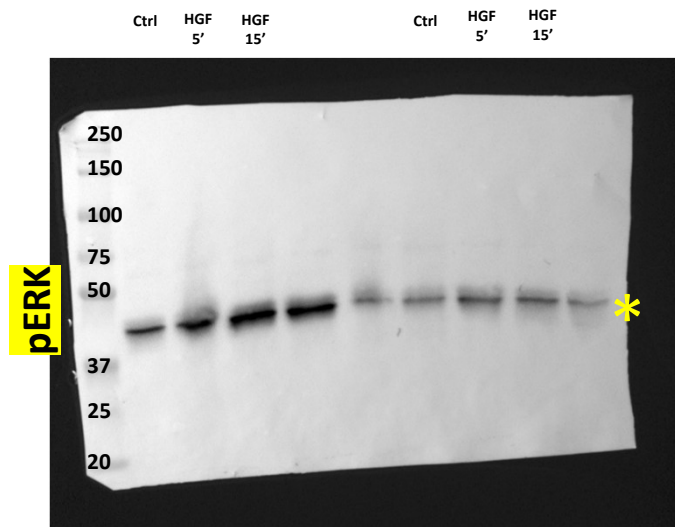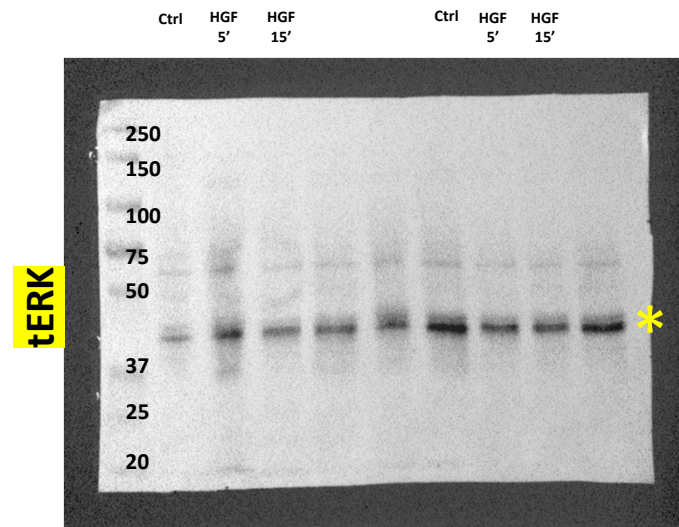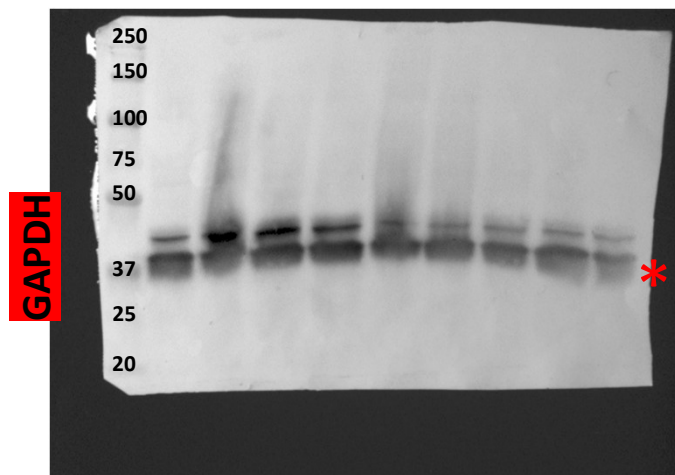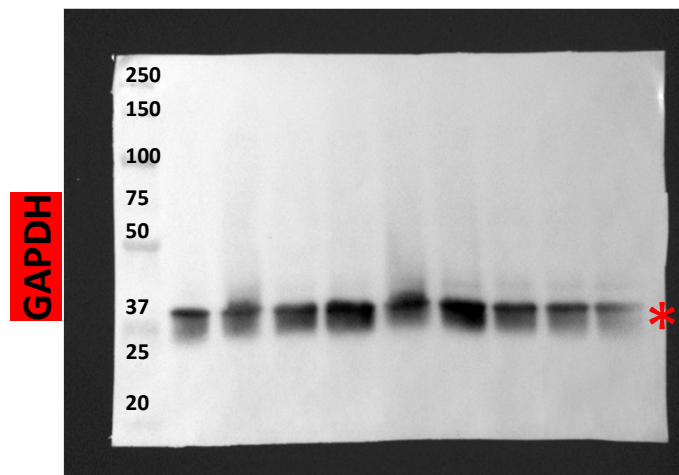

*These blots are relative to results presented in FIGURE 1*

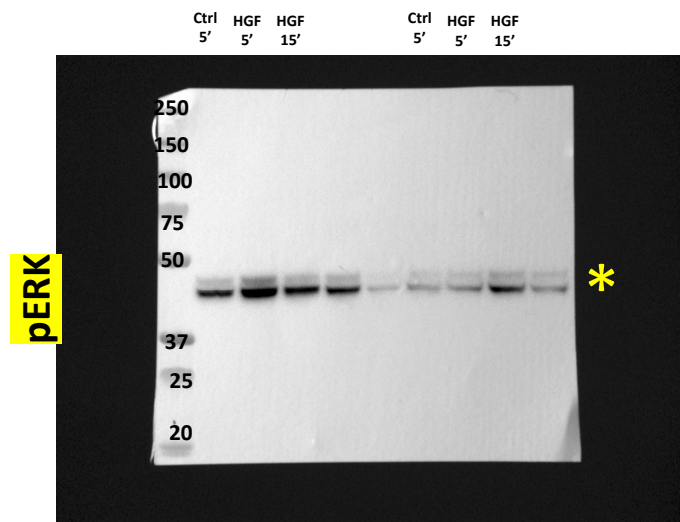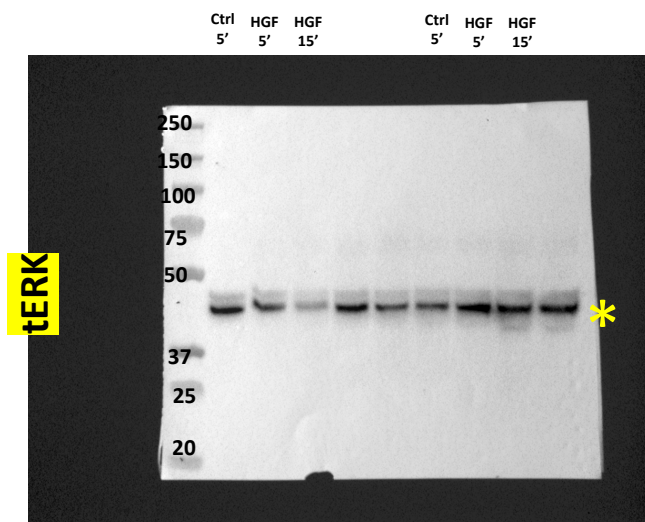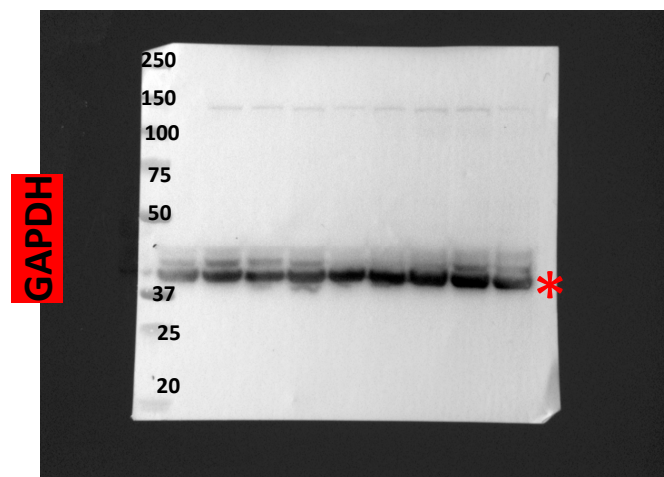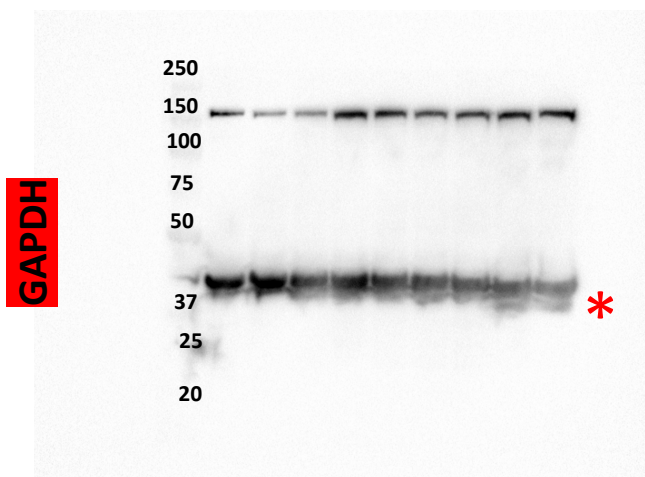

*These blots are relative to results  
presented in FIGURE 1*



Ctrl U0126 U0126 U0126 U0126  
5' 15' 30' 60'

pERK

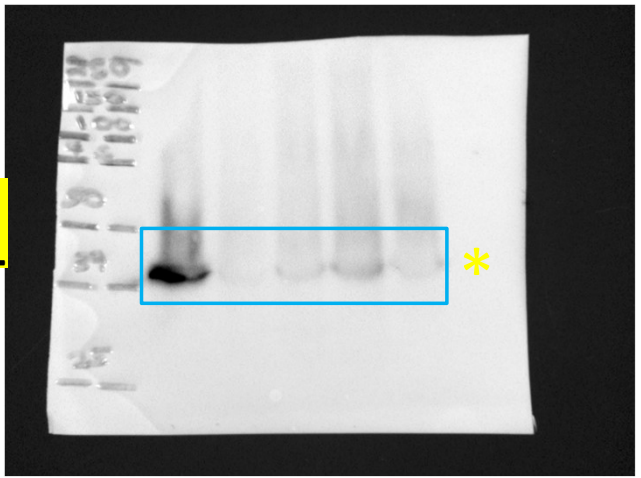

Ctrl U0126 U0126 U0126 U0126  
5' 15' 30' 60'

GAPDH

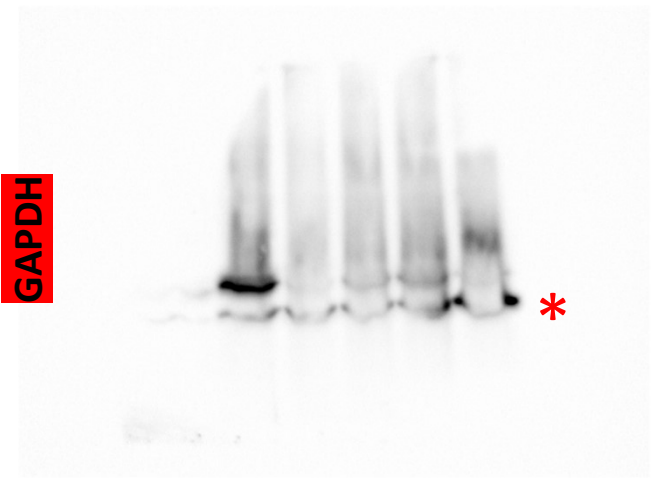

Ctrl U0126 U0126 U0126 U0126  
5' 15' 30' 60'

ACTIN

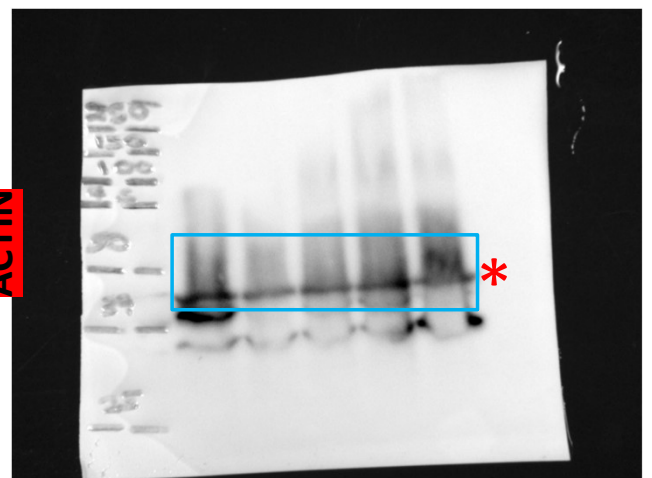

tERK

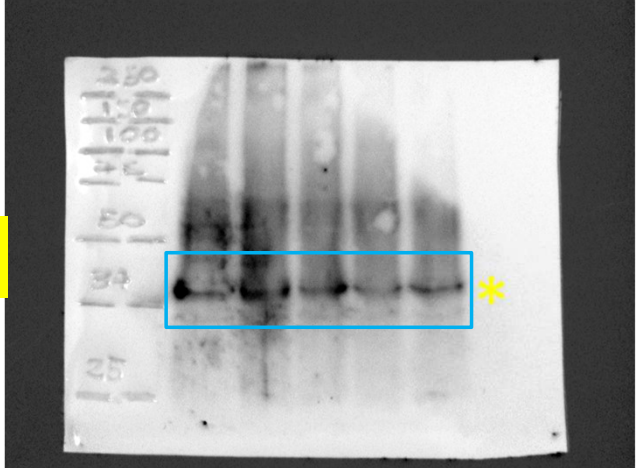

GAPDH

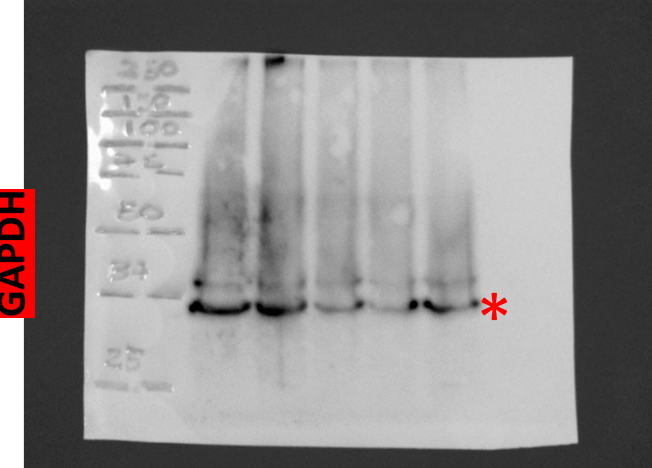

ACTIN

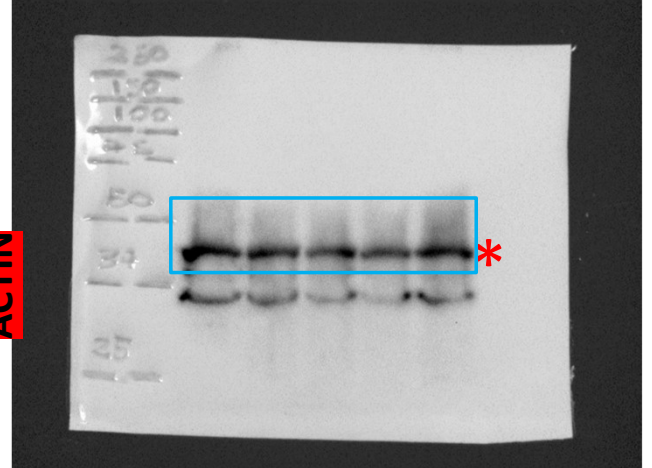

Blue boxes indicate WB lines selected for figures included in the paper.  
FIGURE 2B

Ctrl U0126 5' U0126 15' U0126 30' U0126 60'

pERK

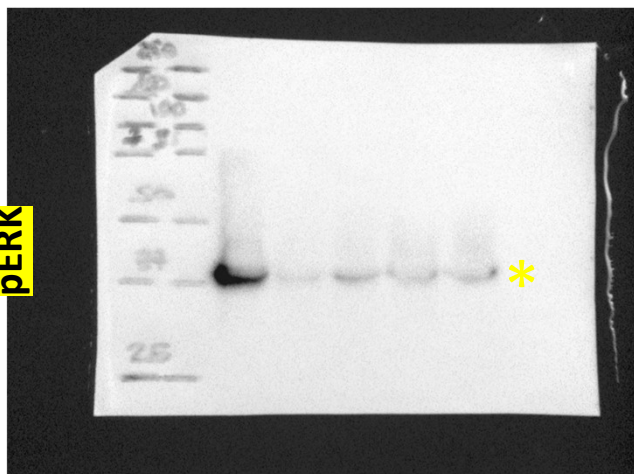

Ctrl U0126 5' U0126 15' U0126 30' U0126 60'

GAPDH

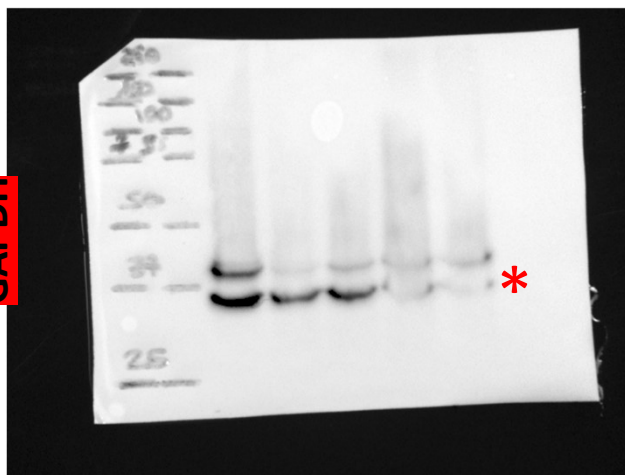

Ctrl U0126 5' U0126 15' U0126 30' U0126 60'

ACTIN

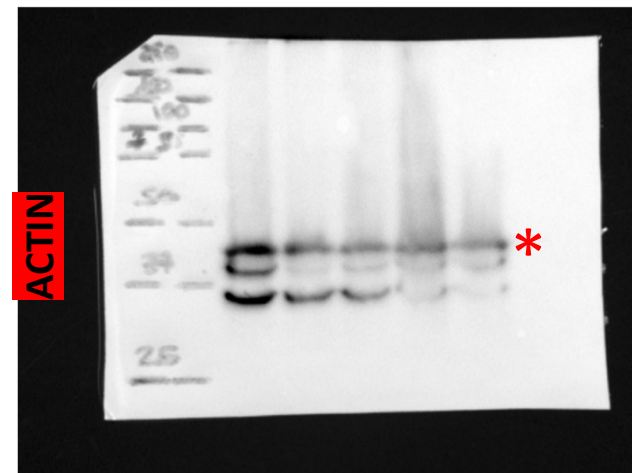

tERK

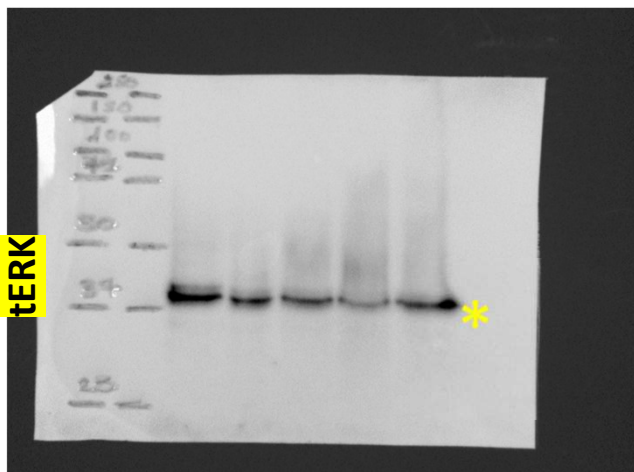

GAPDH

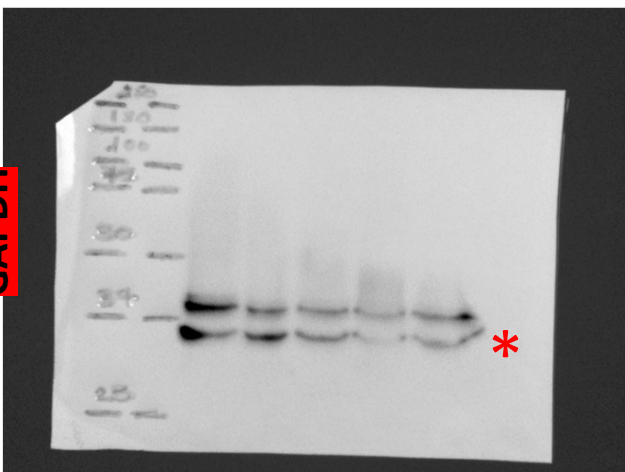

ACTIN

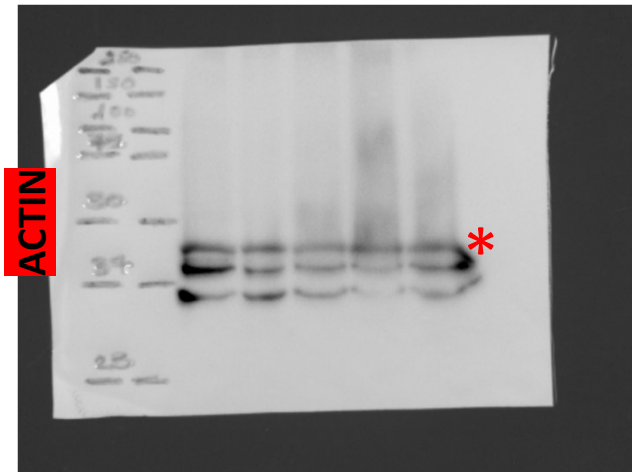

*These blots are relative to results presented in FIGURE 2*

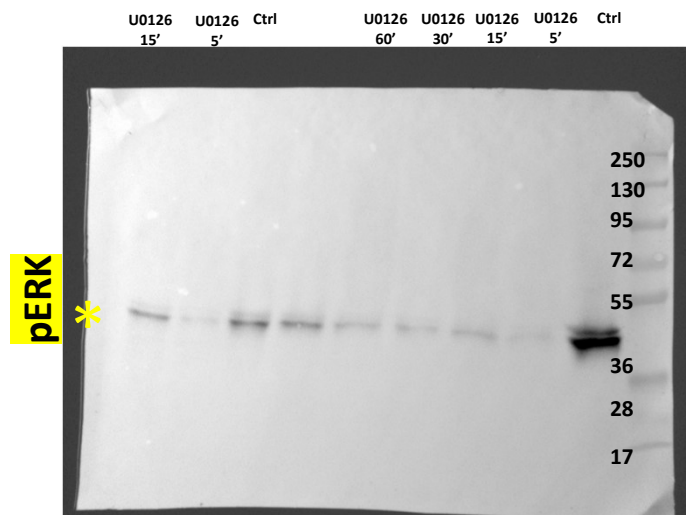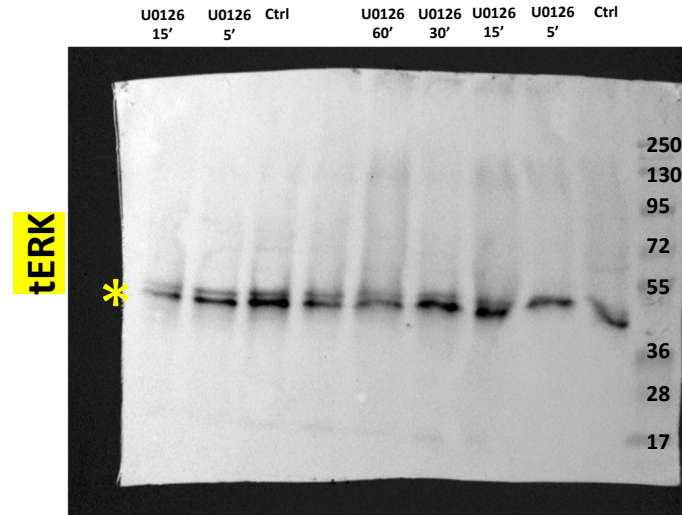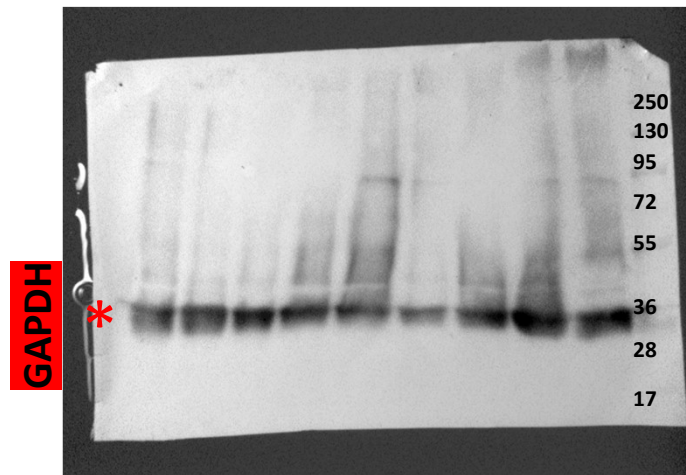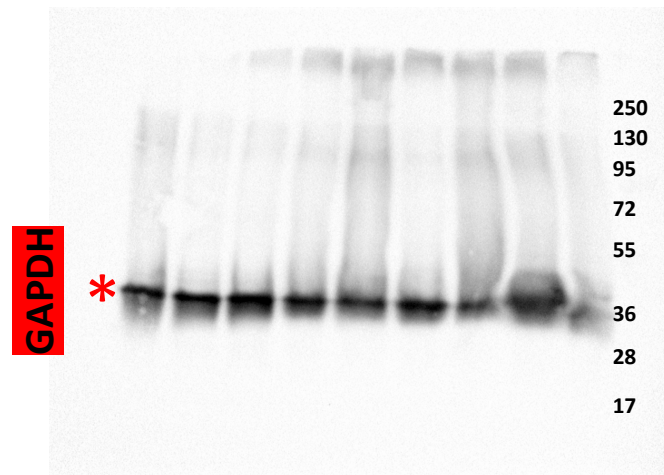

*These blots are relative to results presented in FIGURE 2*

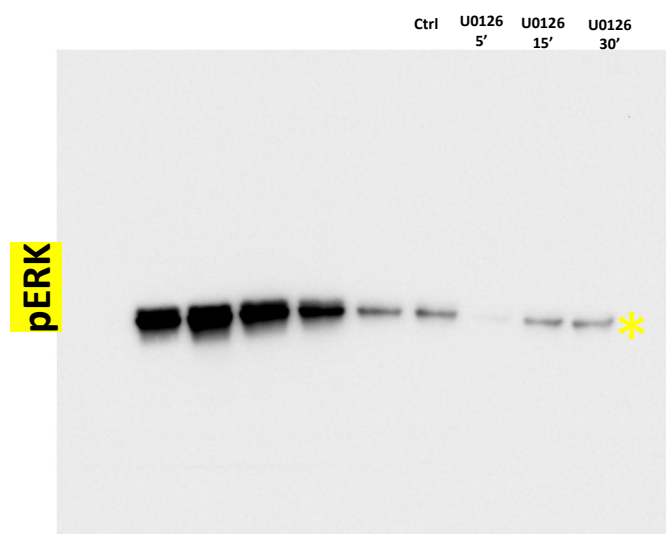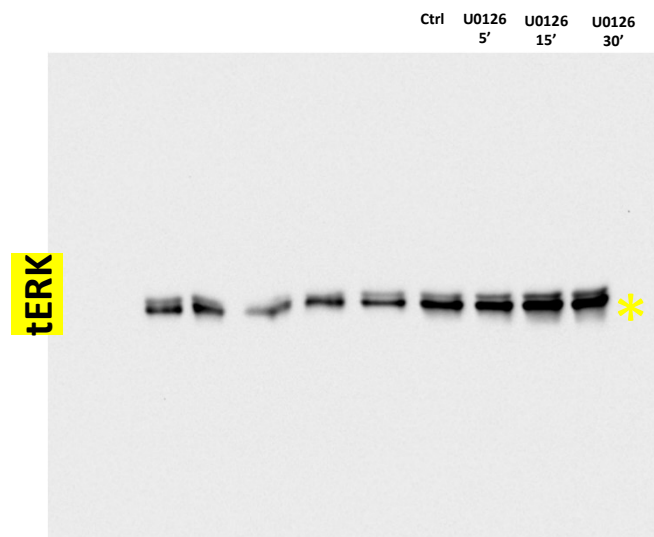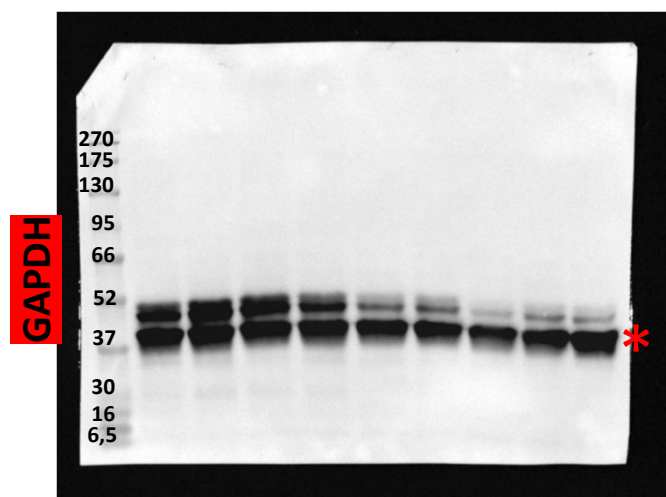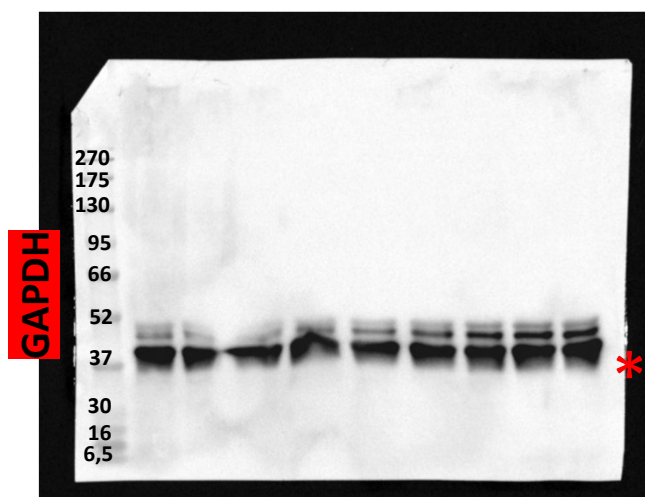

*These blots are relative to results  
presented in FIGURE 2*



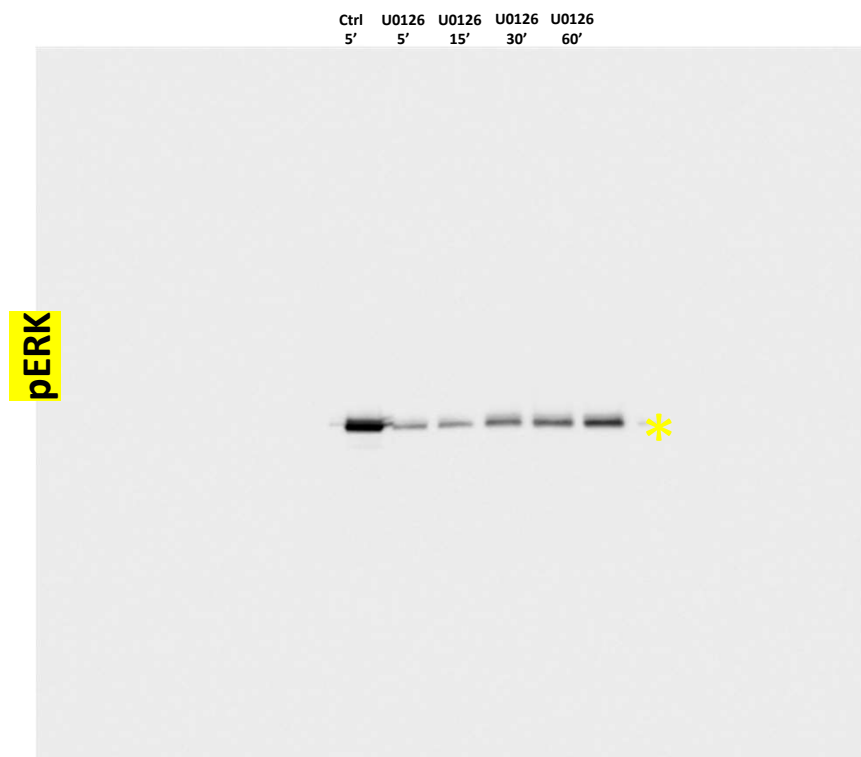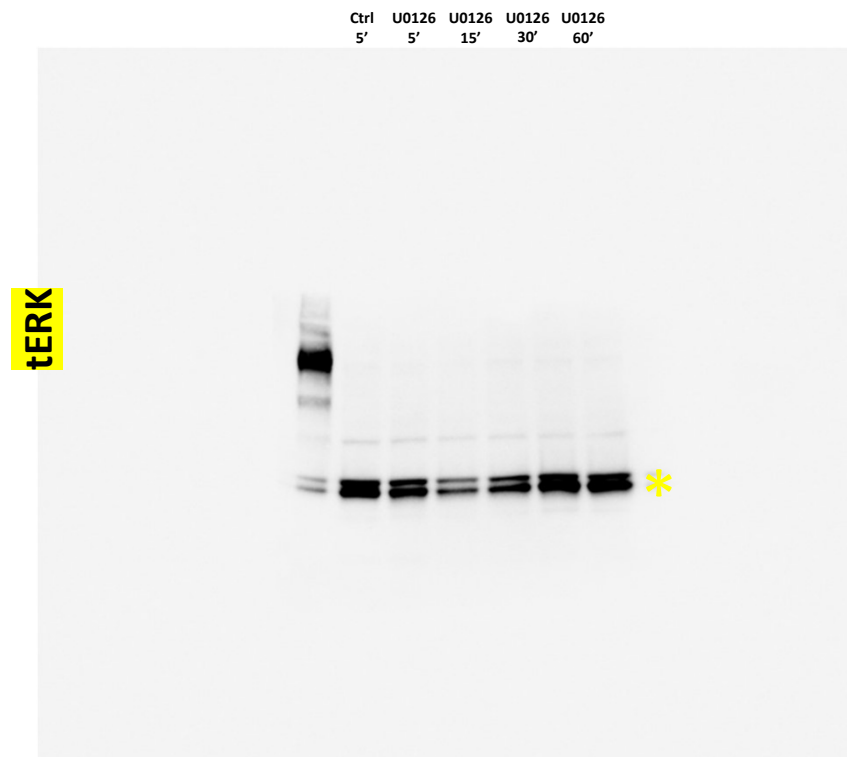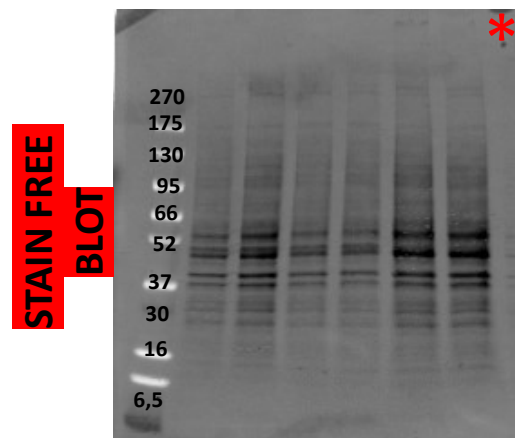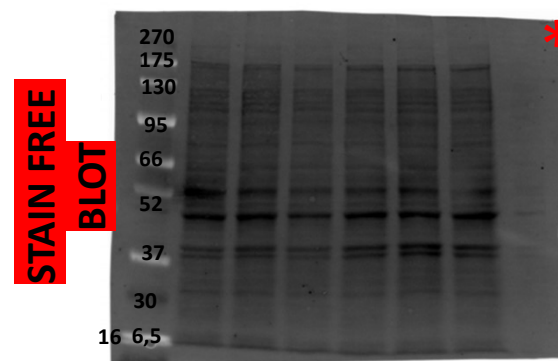

*These blots are relative to results presented in FIGURE 2*

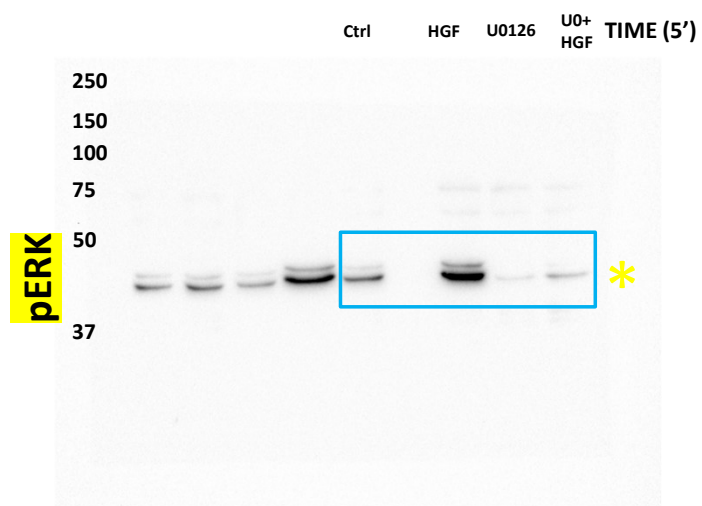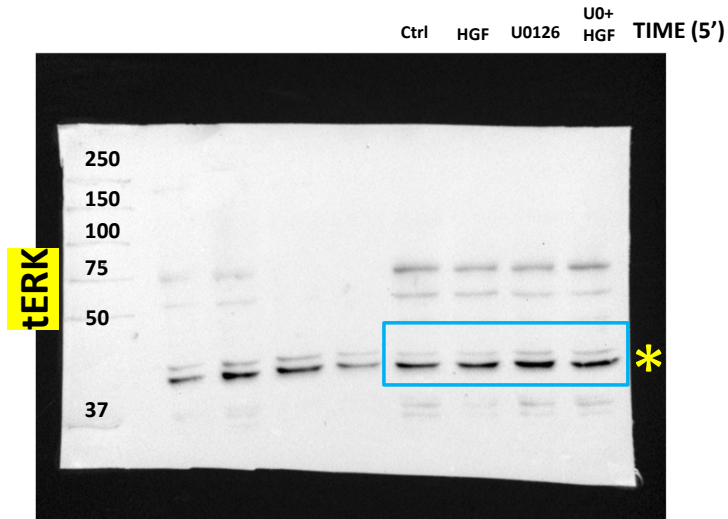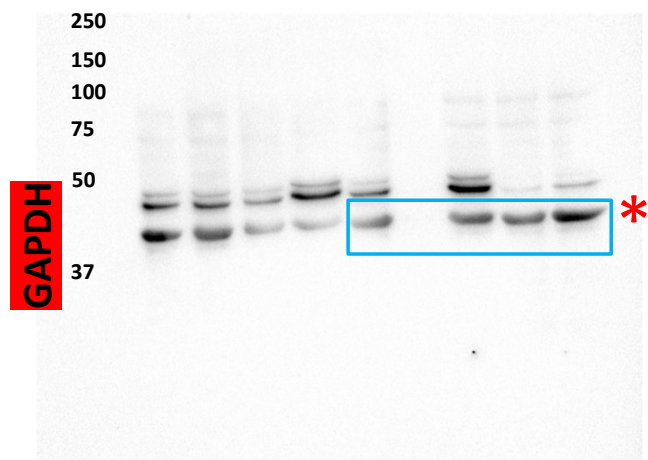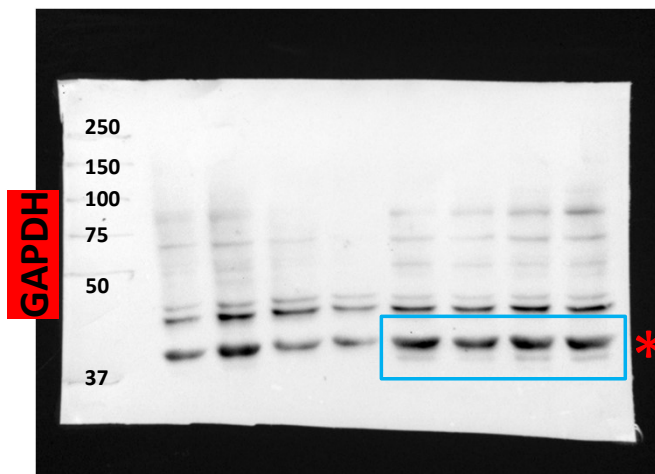

Blue boxes indicate WB lines selected for figures included in the paper.  
FIGURE 3A

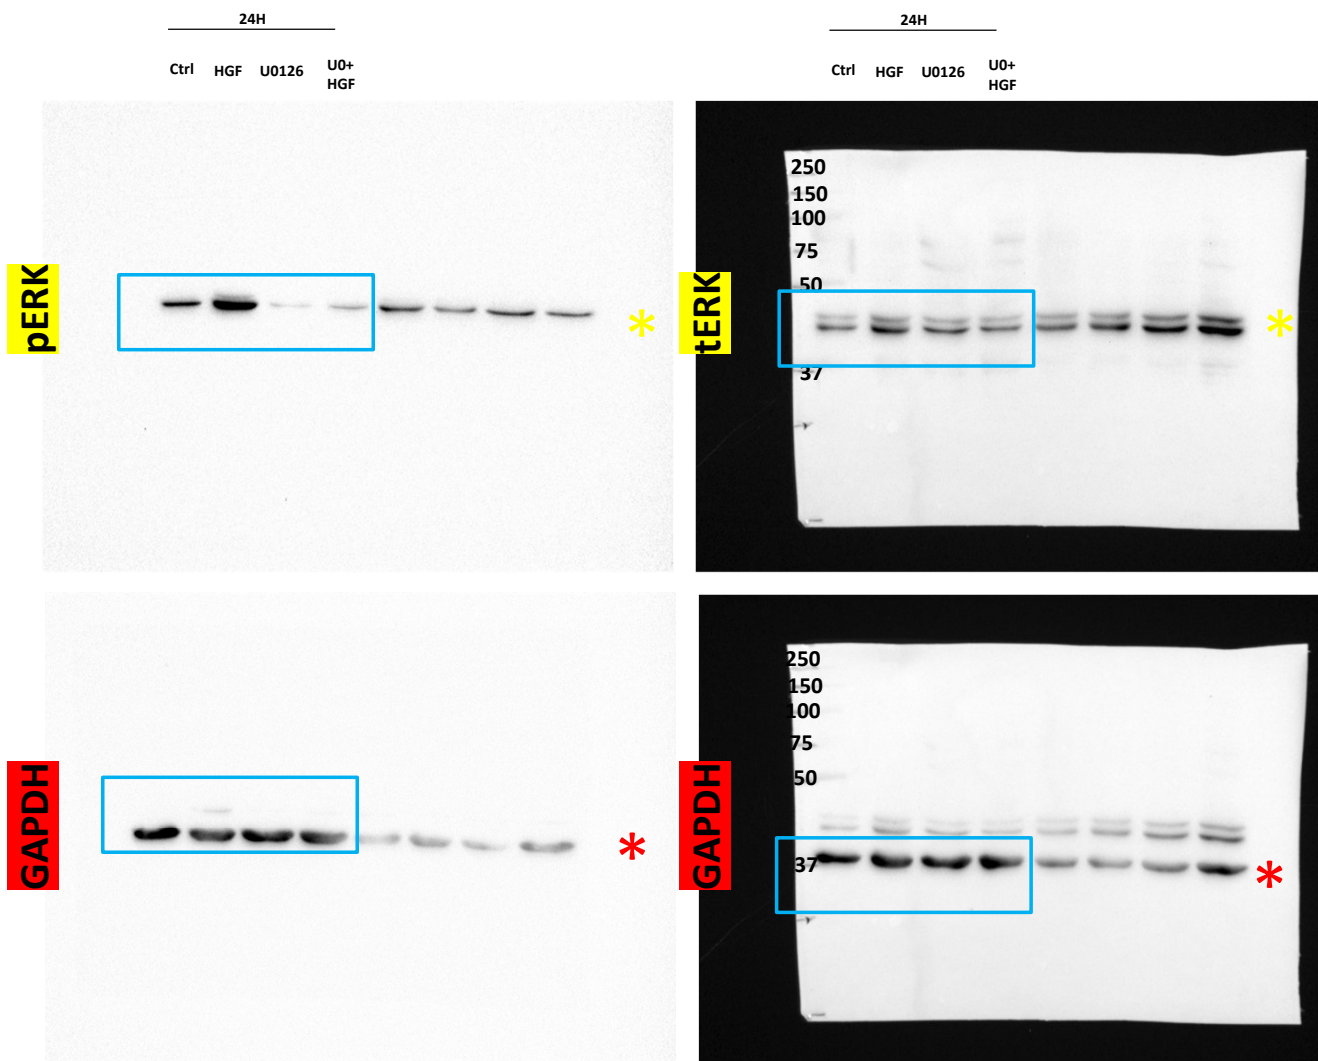

Blue boxes indicate WB lines selected  
for figures included in the paper.  
FIGURE 3C

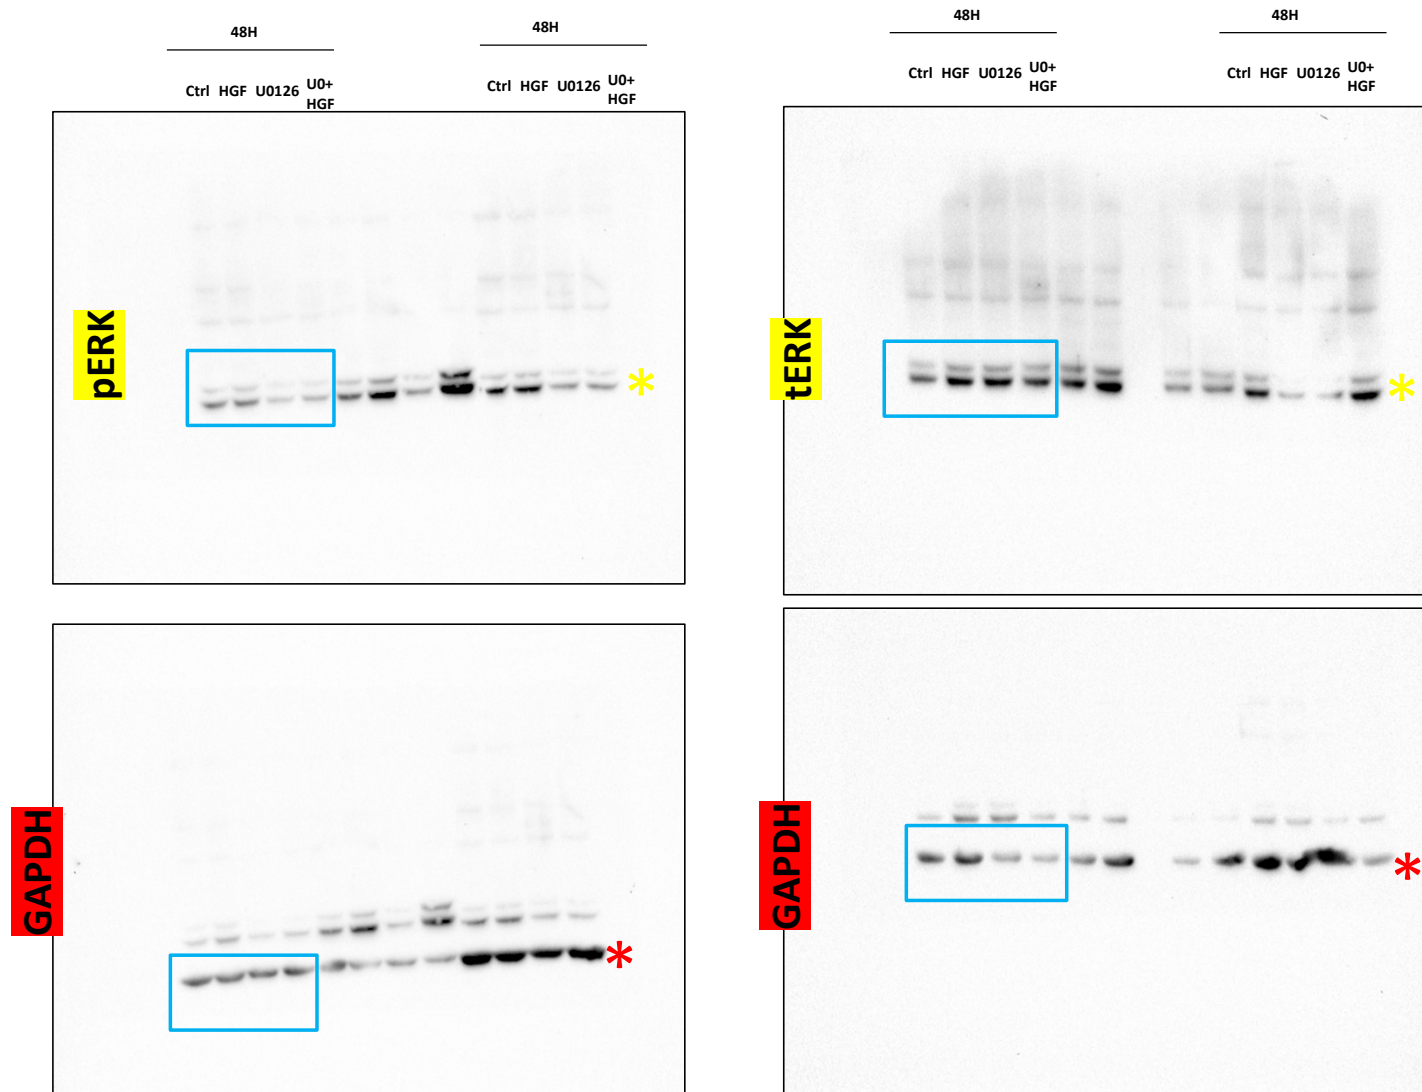

Blue boxes indicate WB lines selected for figures included in the paper.  
FIGURE 3E



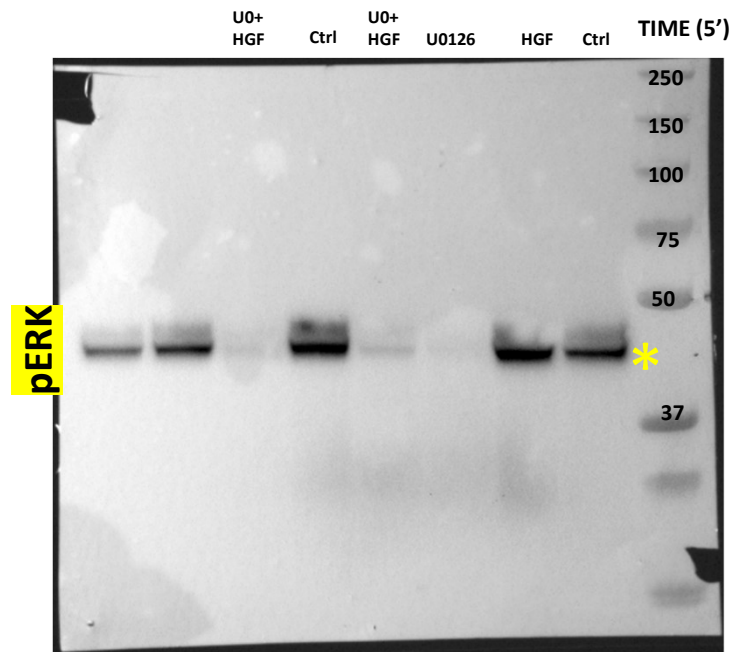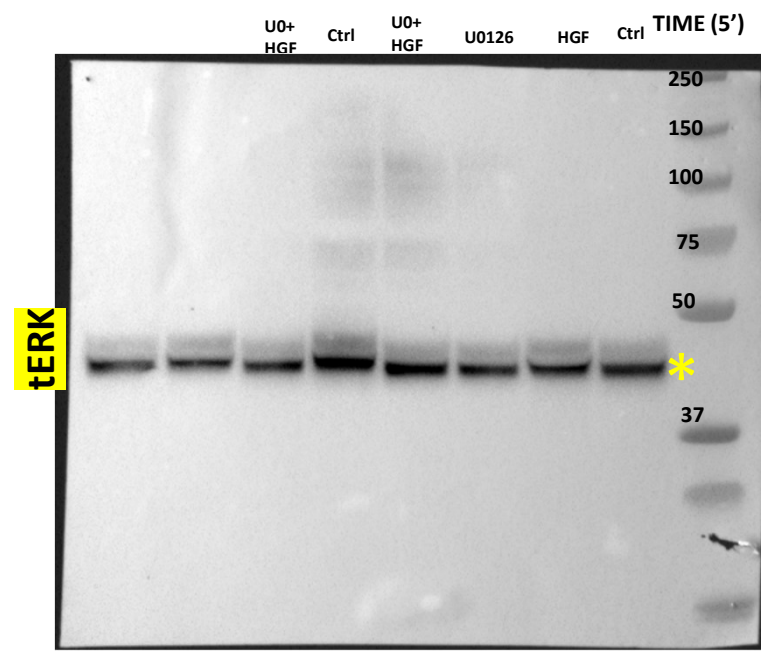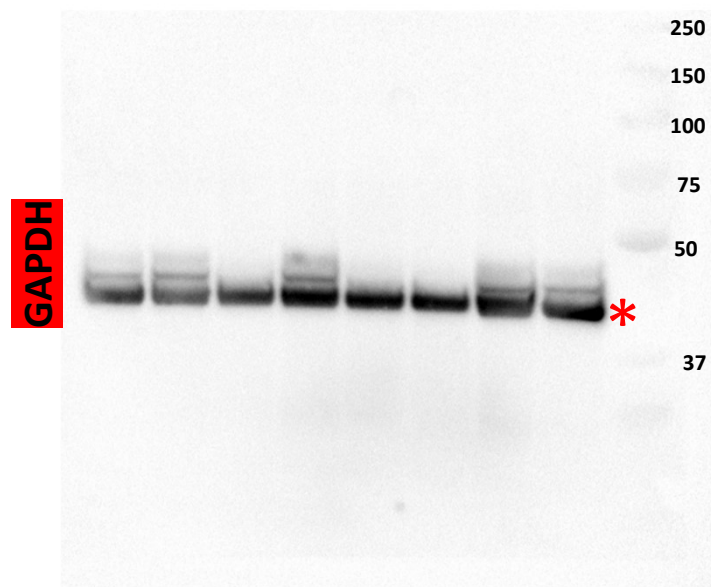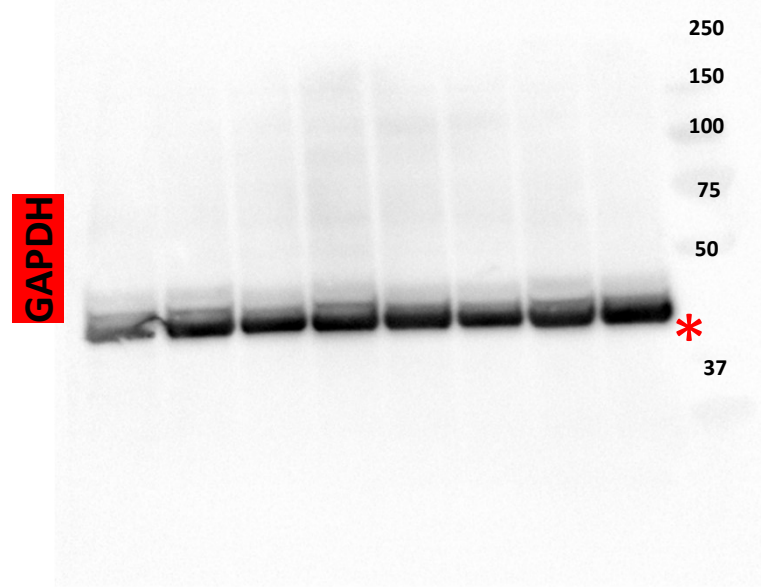

*These blots are relative to results presented in FIGURE 3*

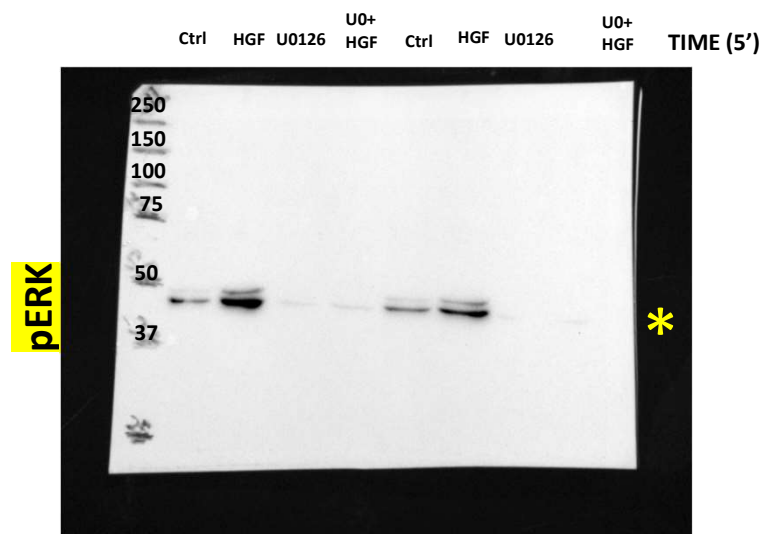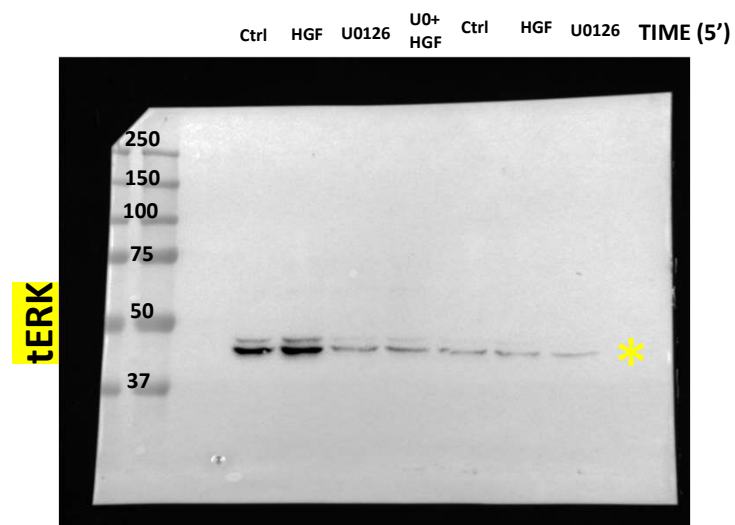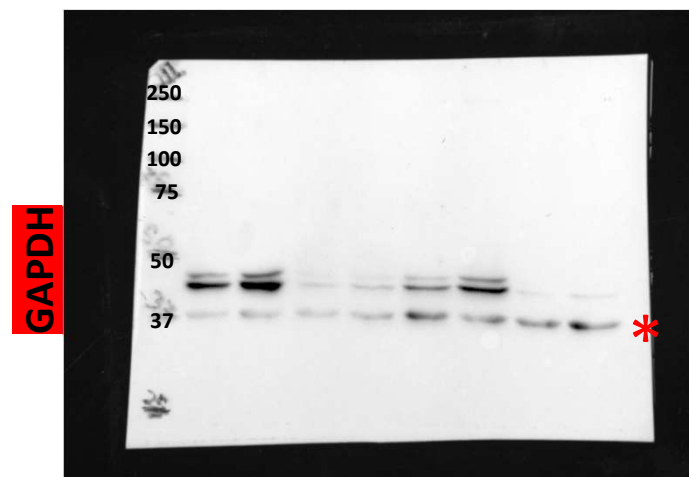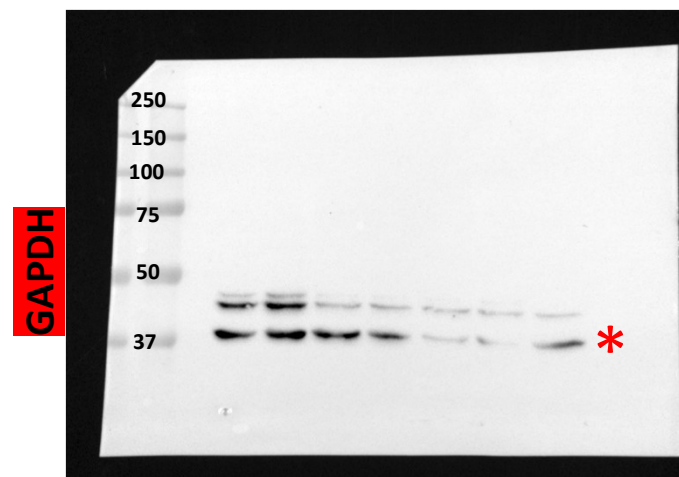

*These blots are relative to results presented in FIGURE 3*

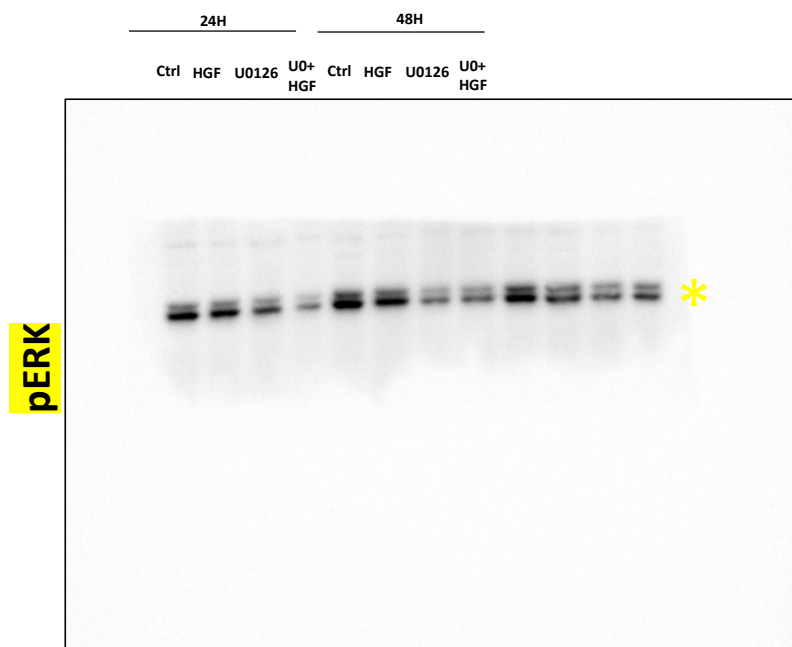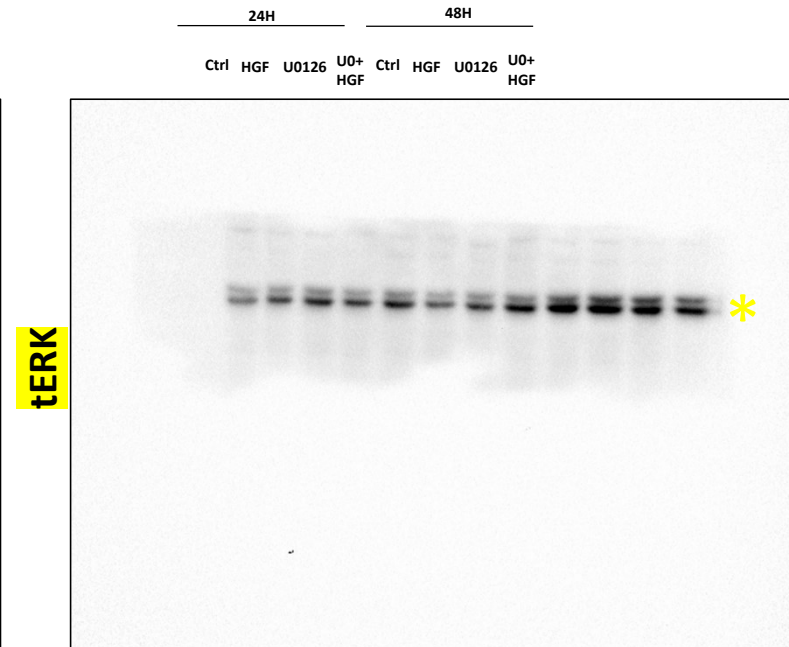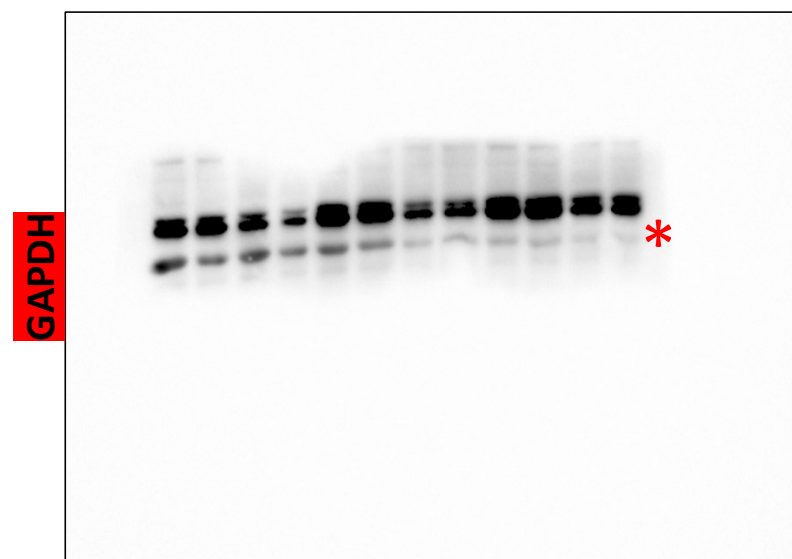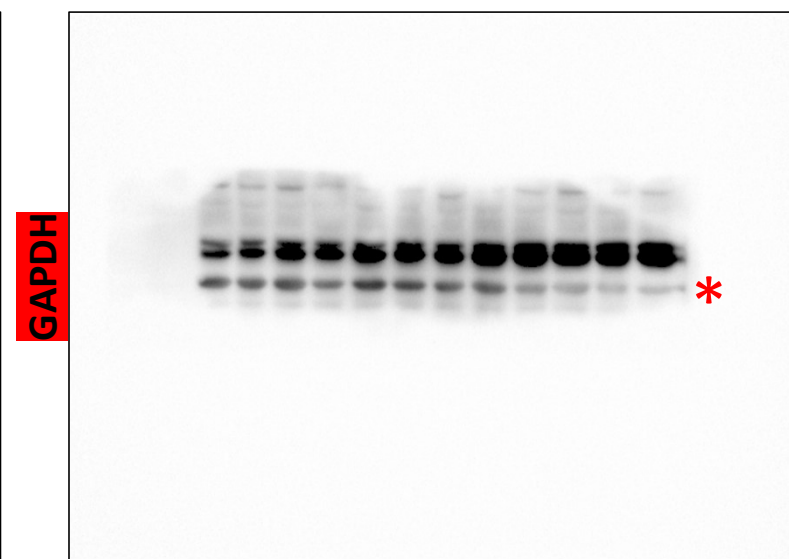

*These blots are  
relative to results  
presented in FIGURE 3*

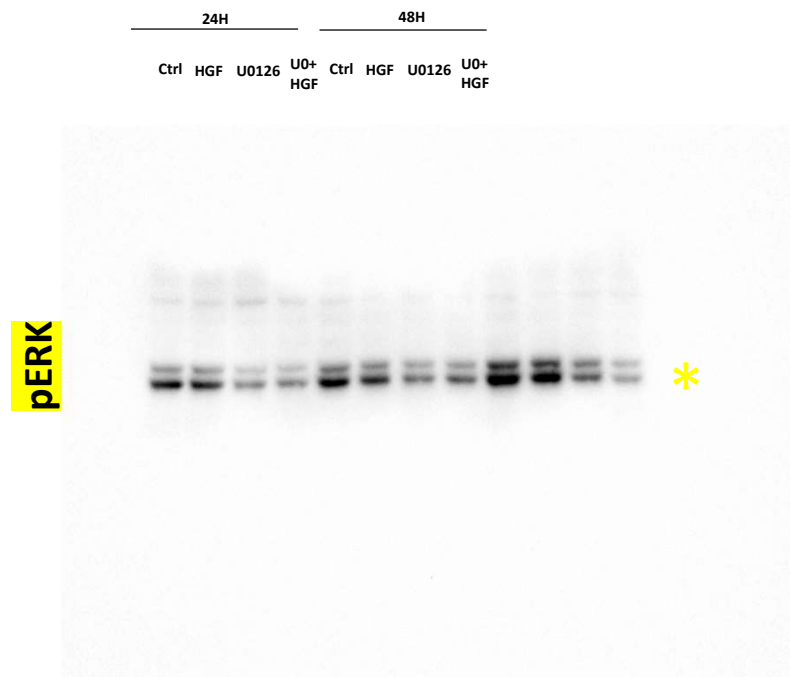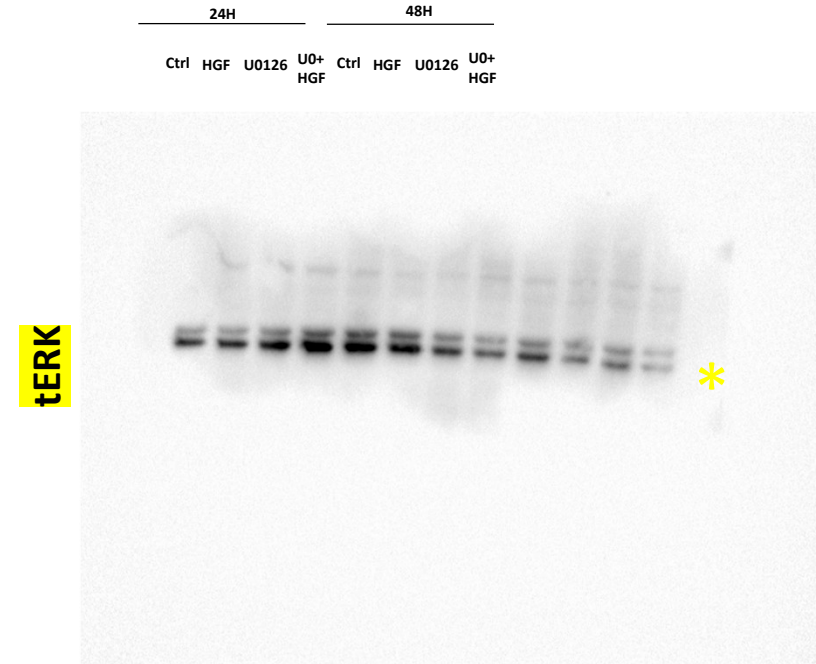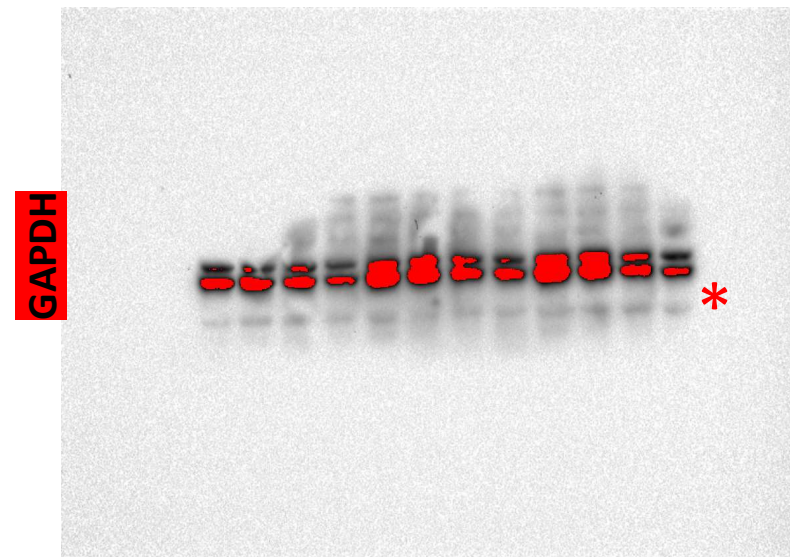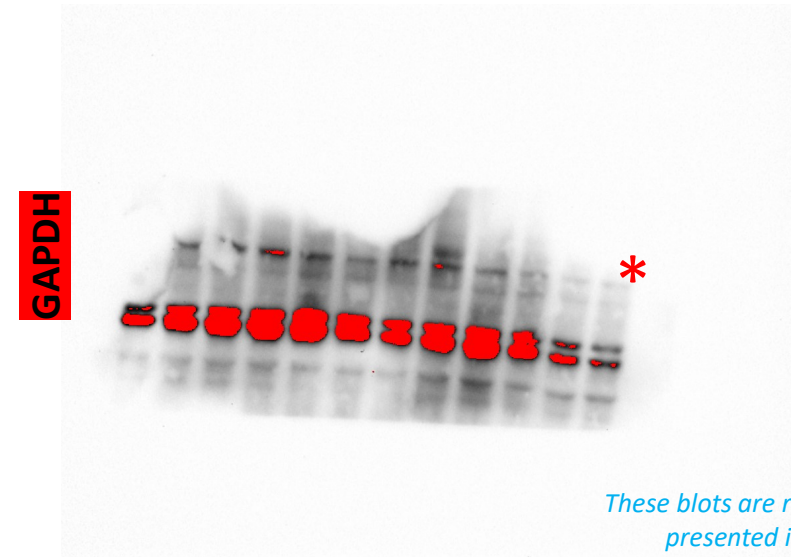

*These blots are relative to results presented in FIGURE 3*



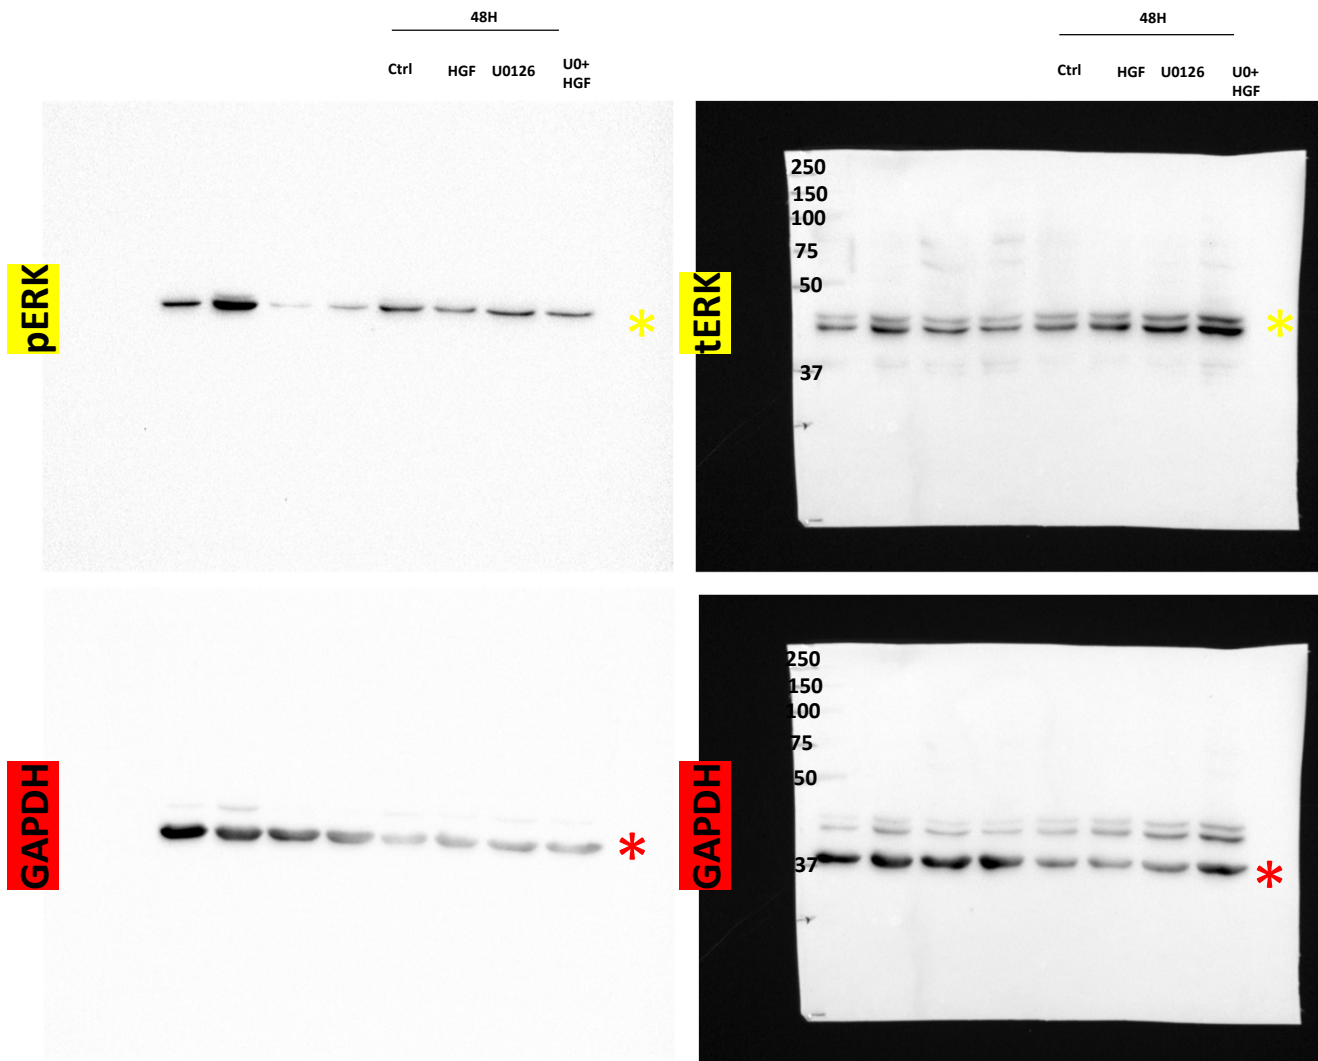

*These blots are relative to results presented in FIGURE 3*

pERK

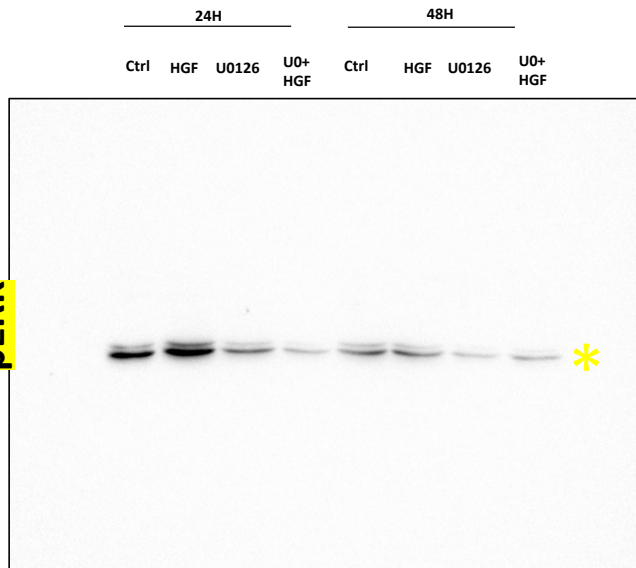

GAPDH

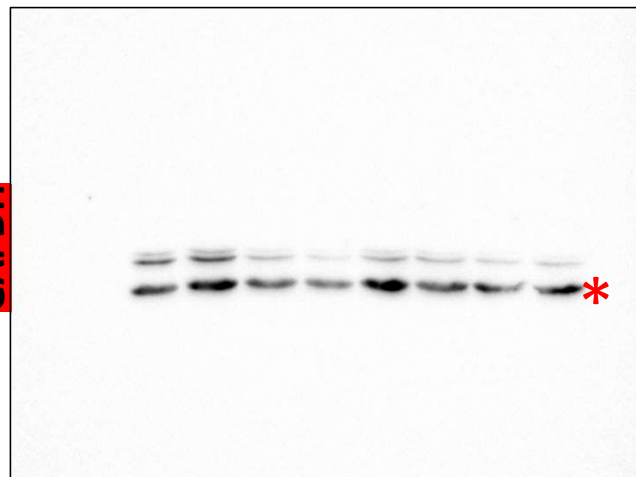

tERK

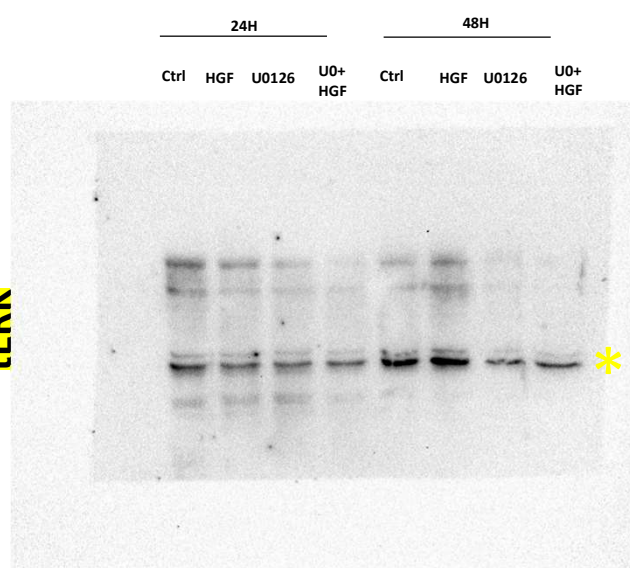

GAPDH

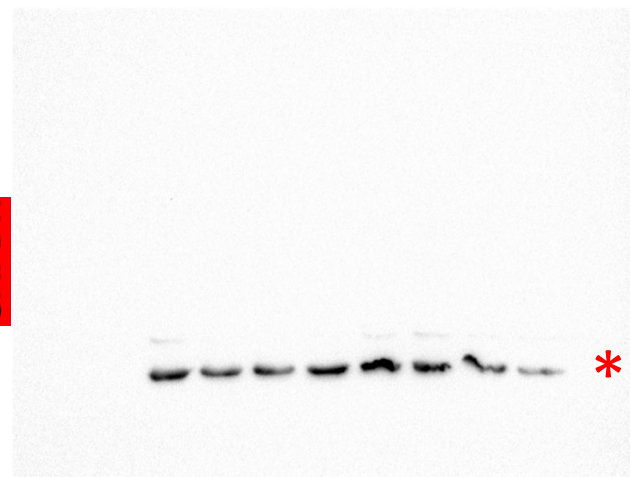

*These blots are relative to results presented in FIGURE 3*

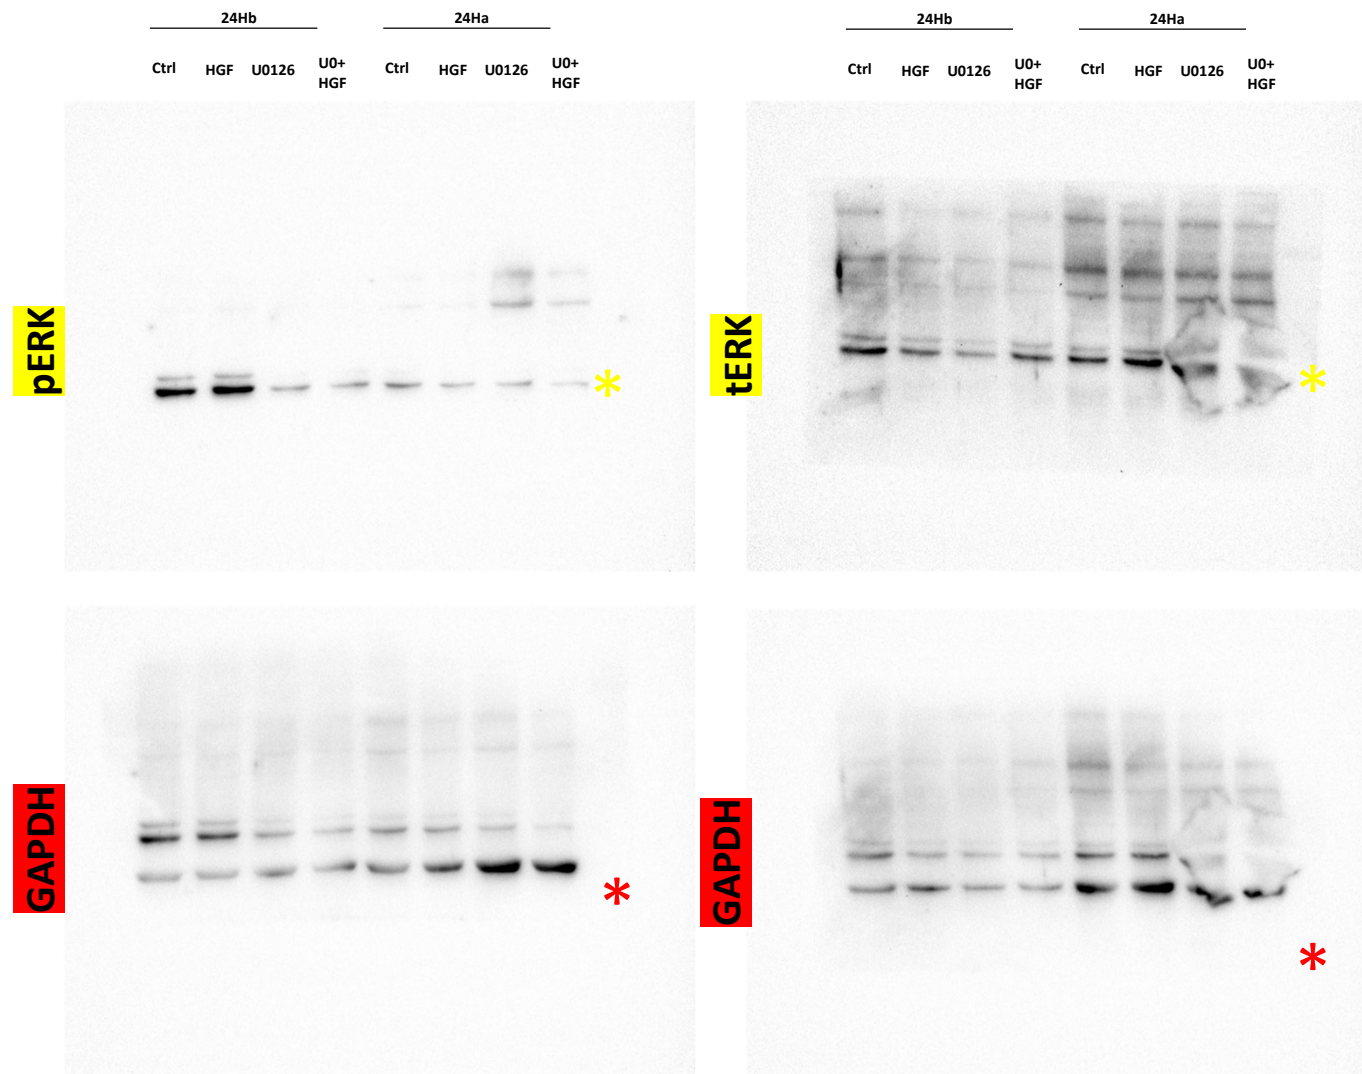

*These blots are relative to results  
presented in FIGURE 3*

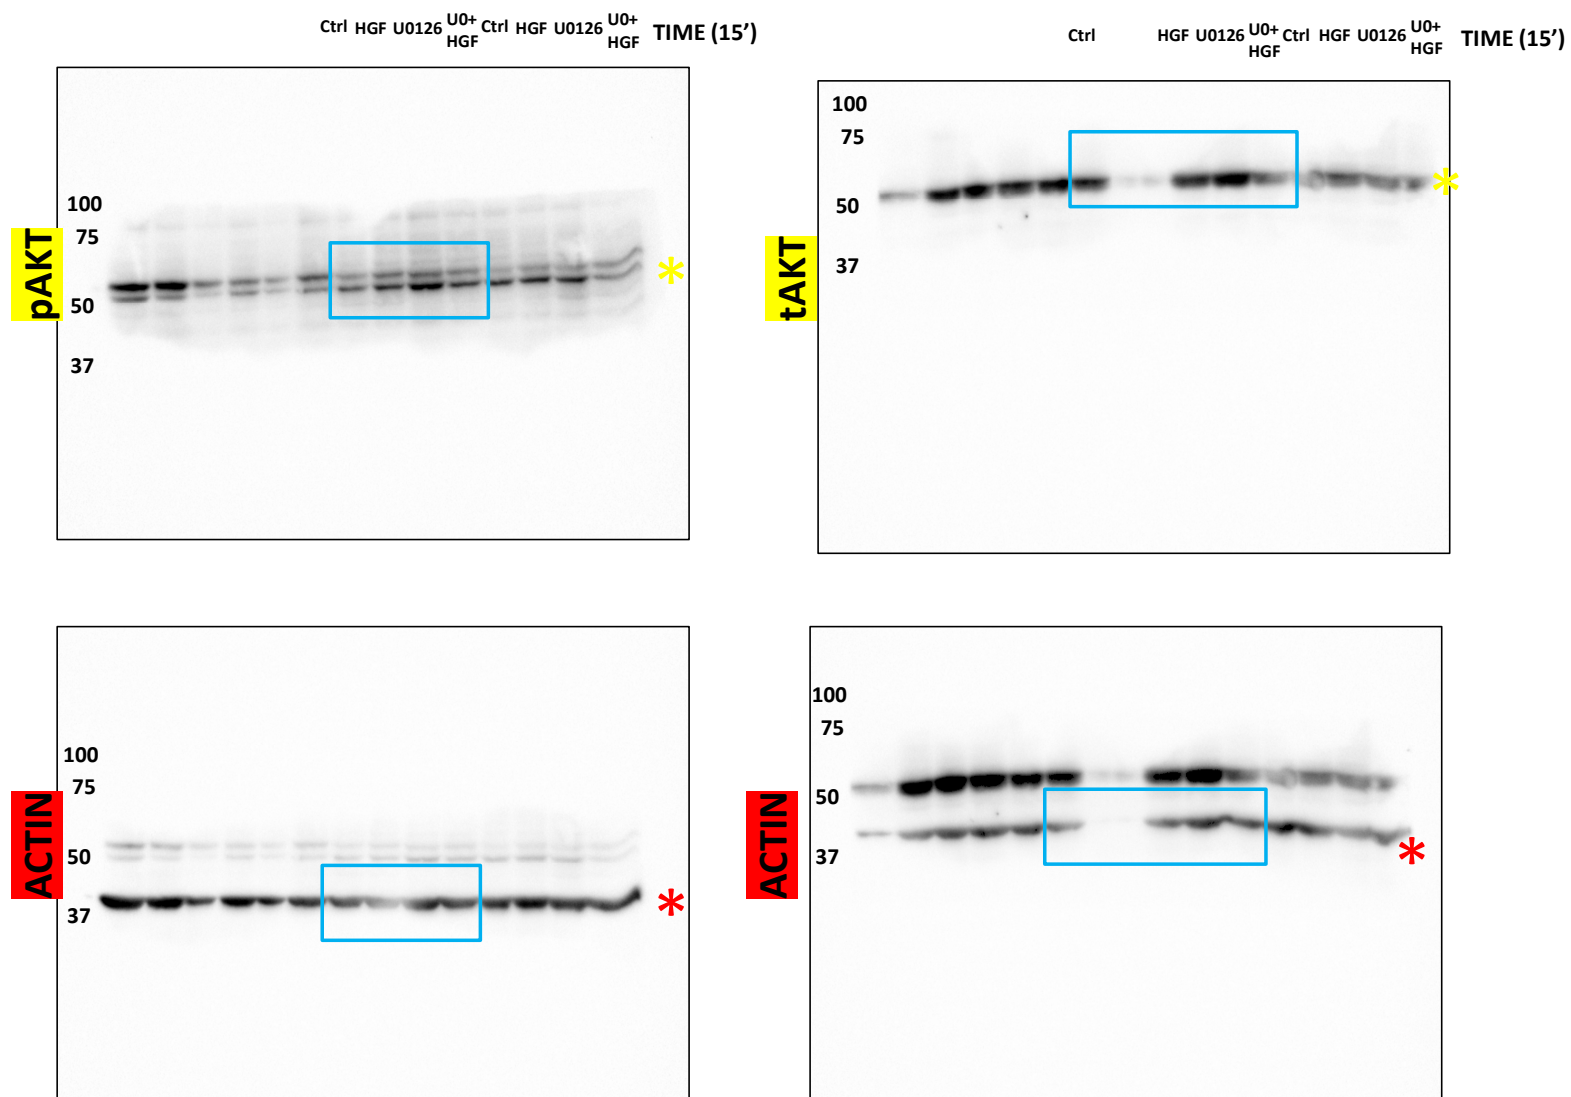

Blue boxes indicate WB lines selected for figures included in the paper.  
FIGURE 7A



Ctrl HGF U0126 X X X Ctrl HGF U0126 X X X

TIME (15')

Ctrl HGF U0126 X X X Ctrl HGF U0126 X X X

Ctrl HGF U0126 U0+  
HGF

TIME (15')

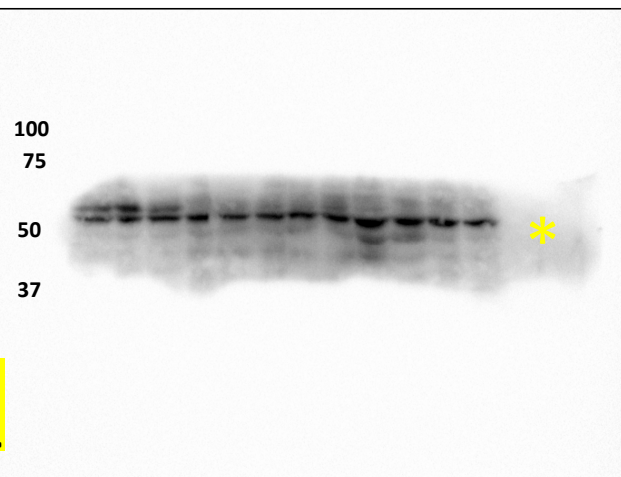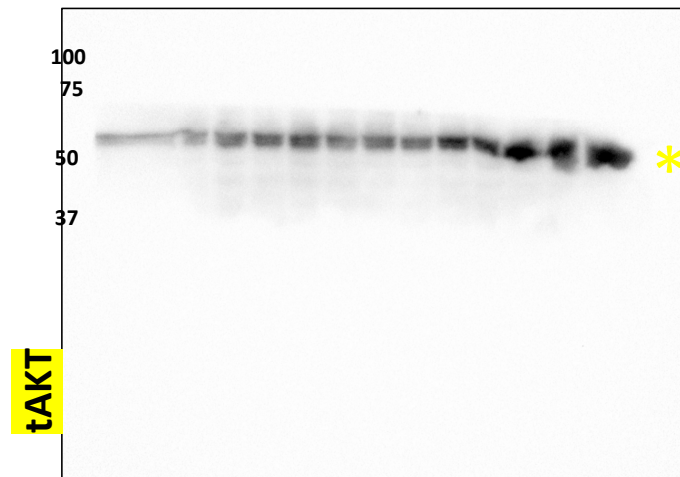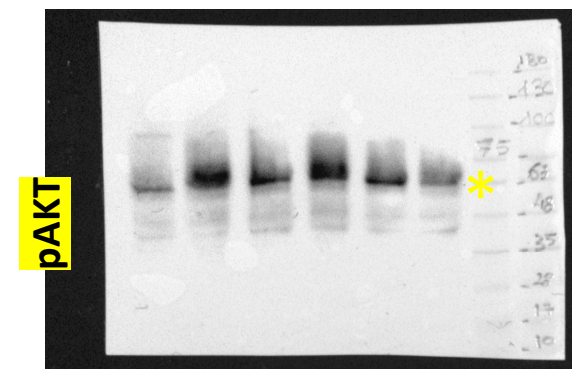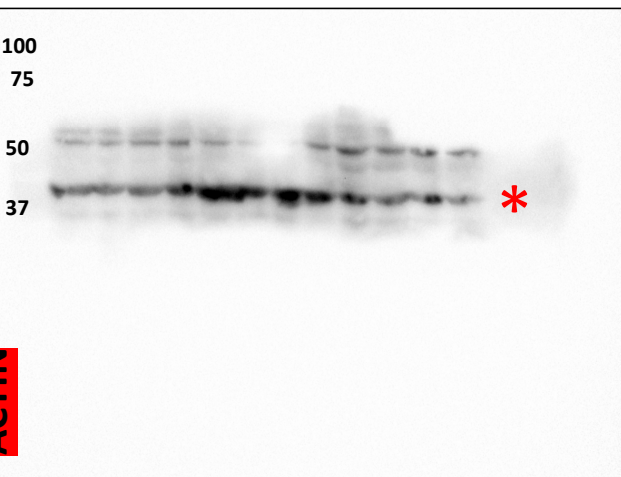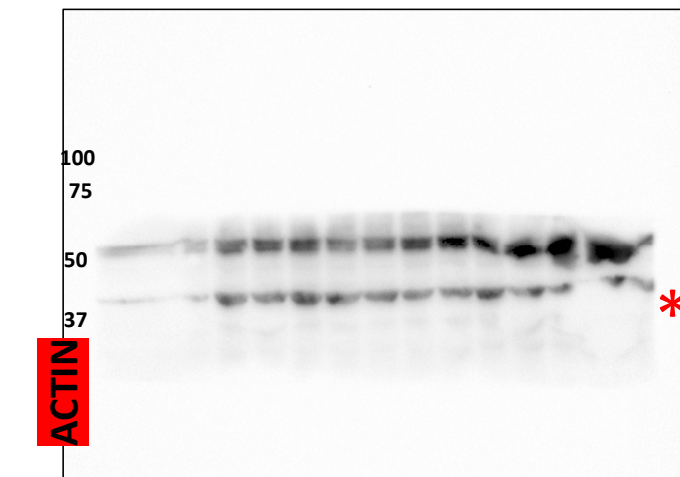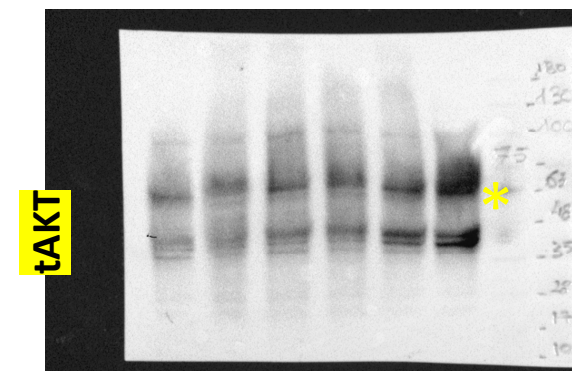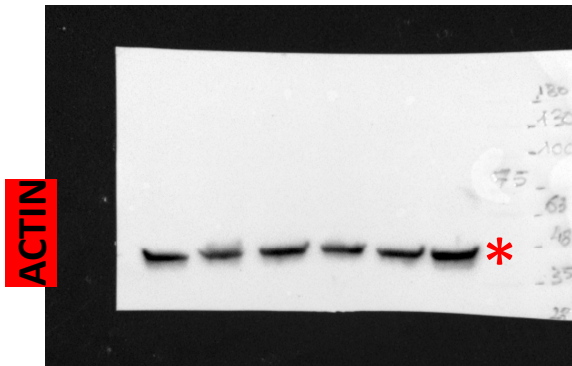

*These blots are relative to results  
presented in FIGURE 7*

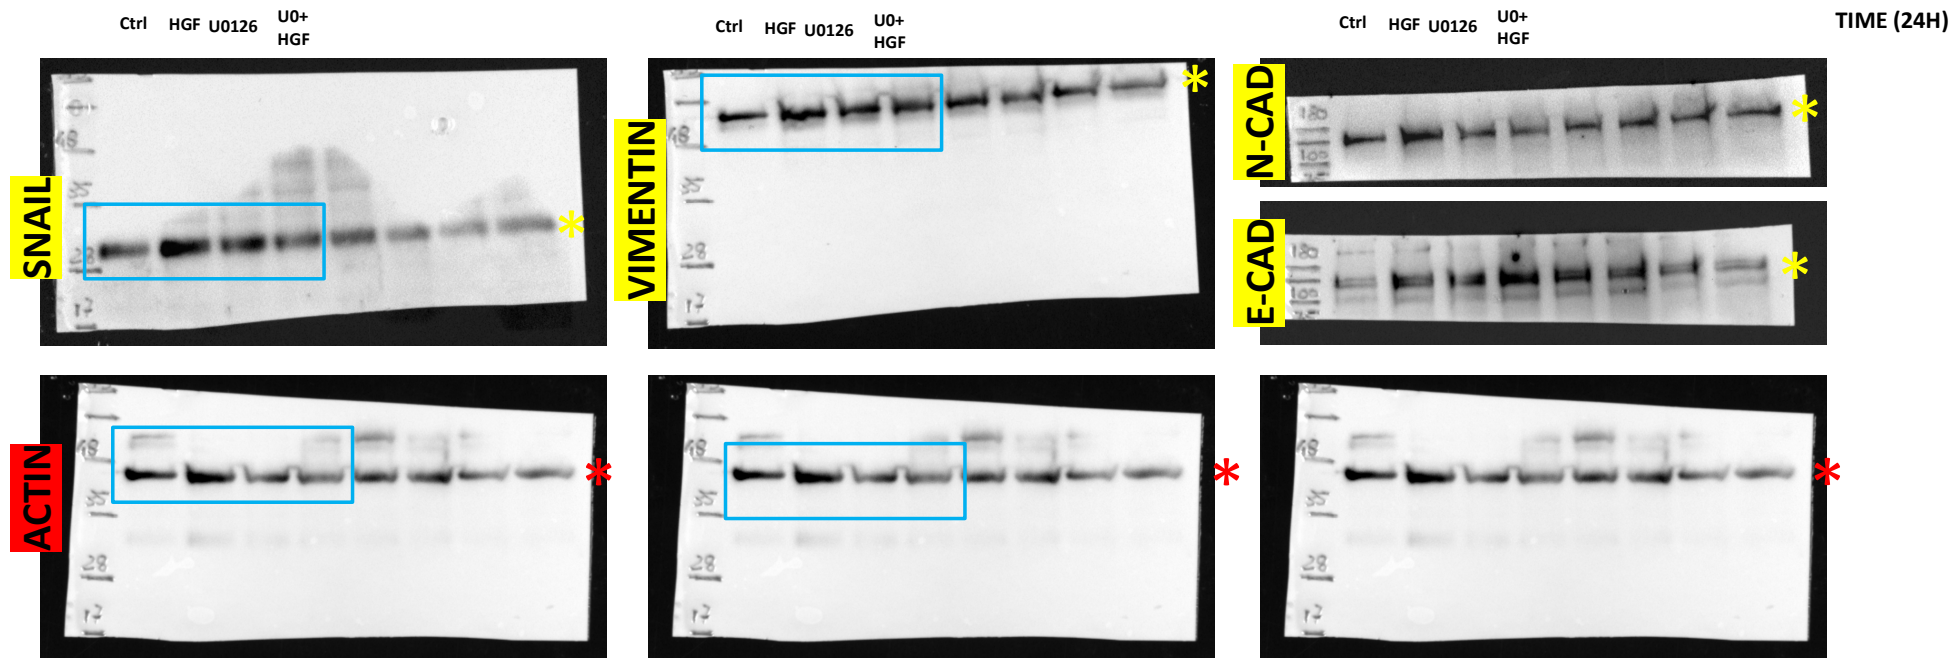

Blue boxes indicate WB lines selected for figures included in the paper.  
FIGURES 8 A, 8 C

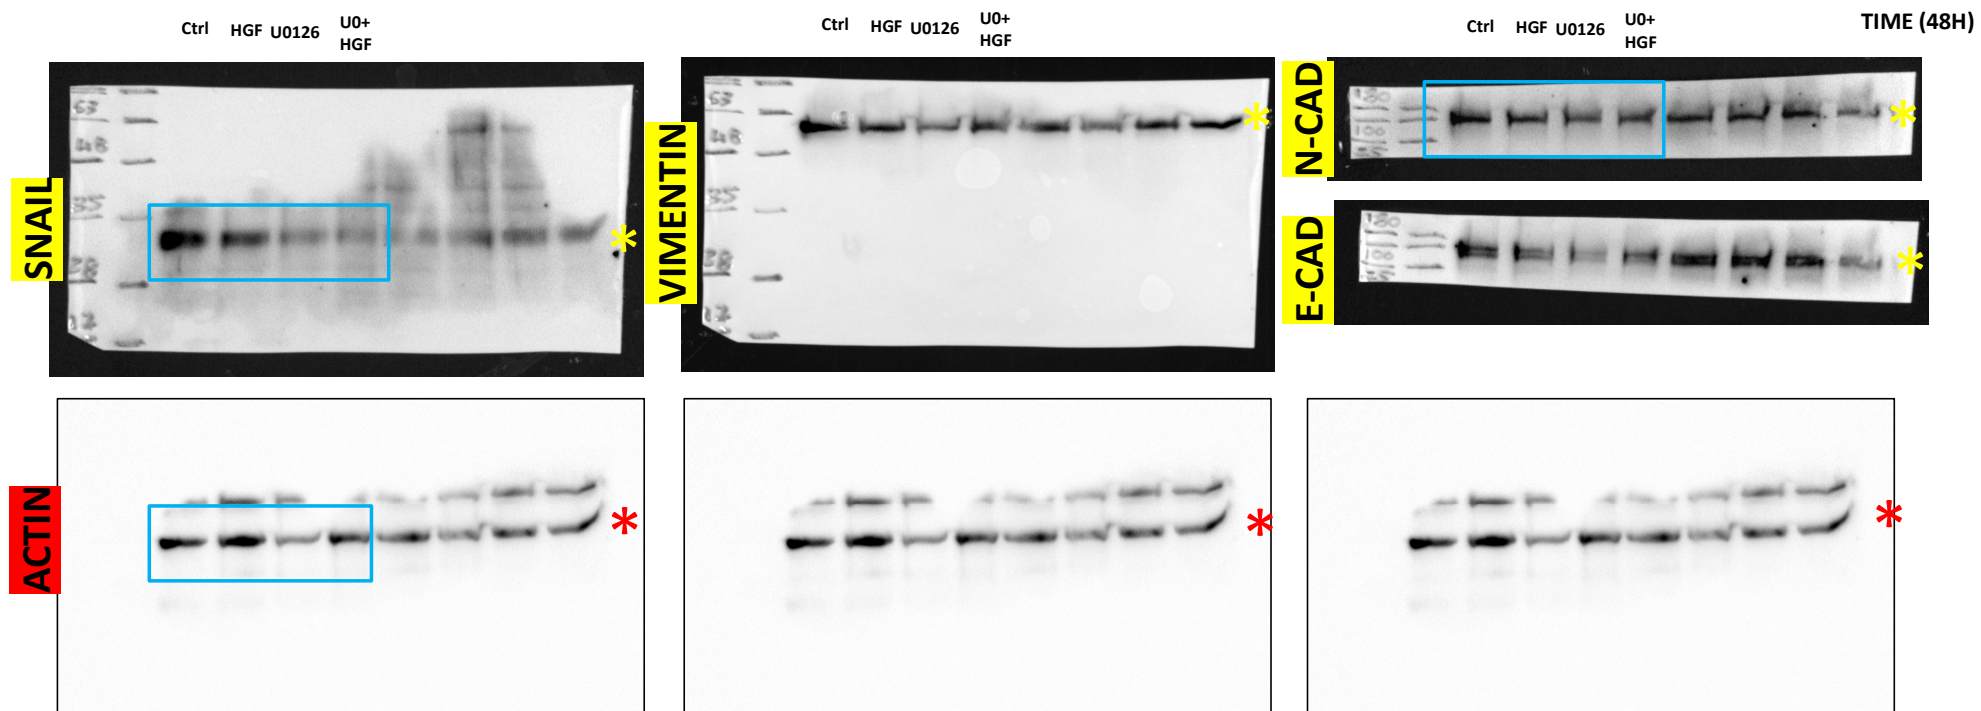

Blue boxes indicate WB lines selected for figures included in the paper.  
FIGURES 8 B, 8 F

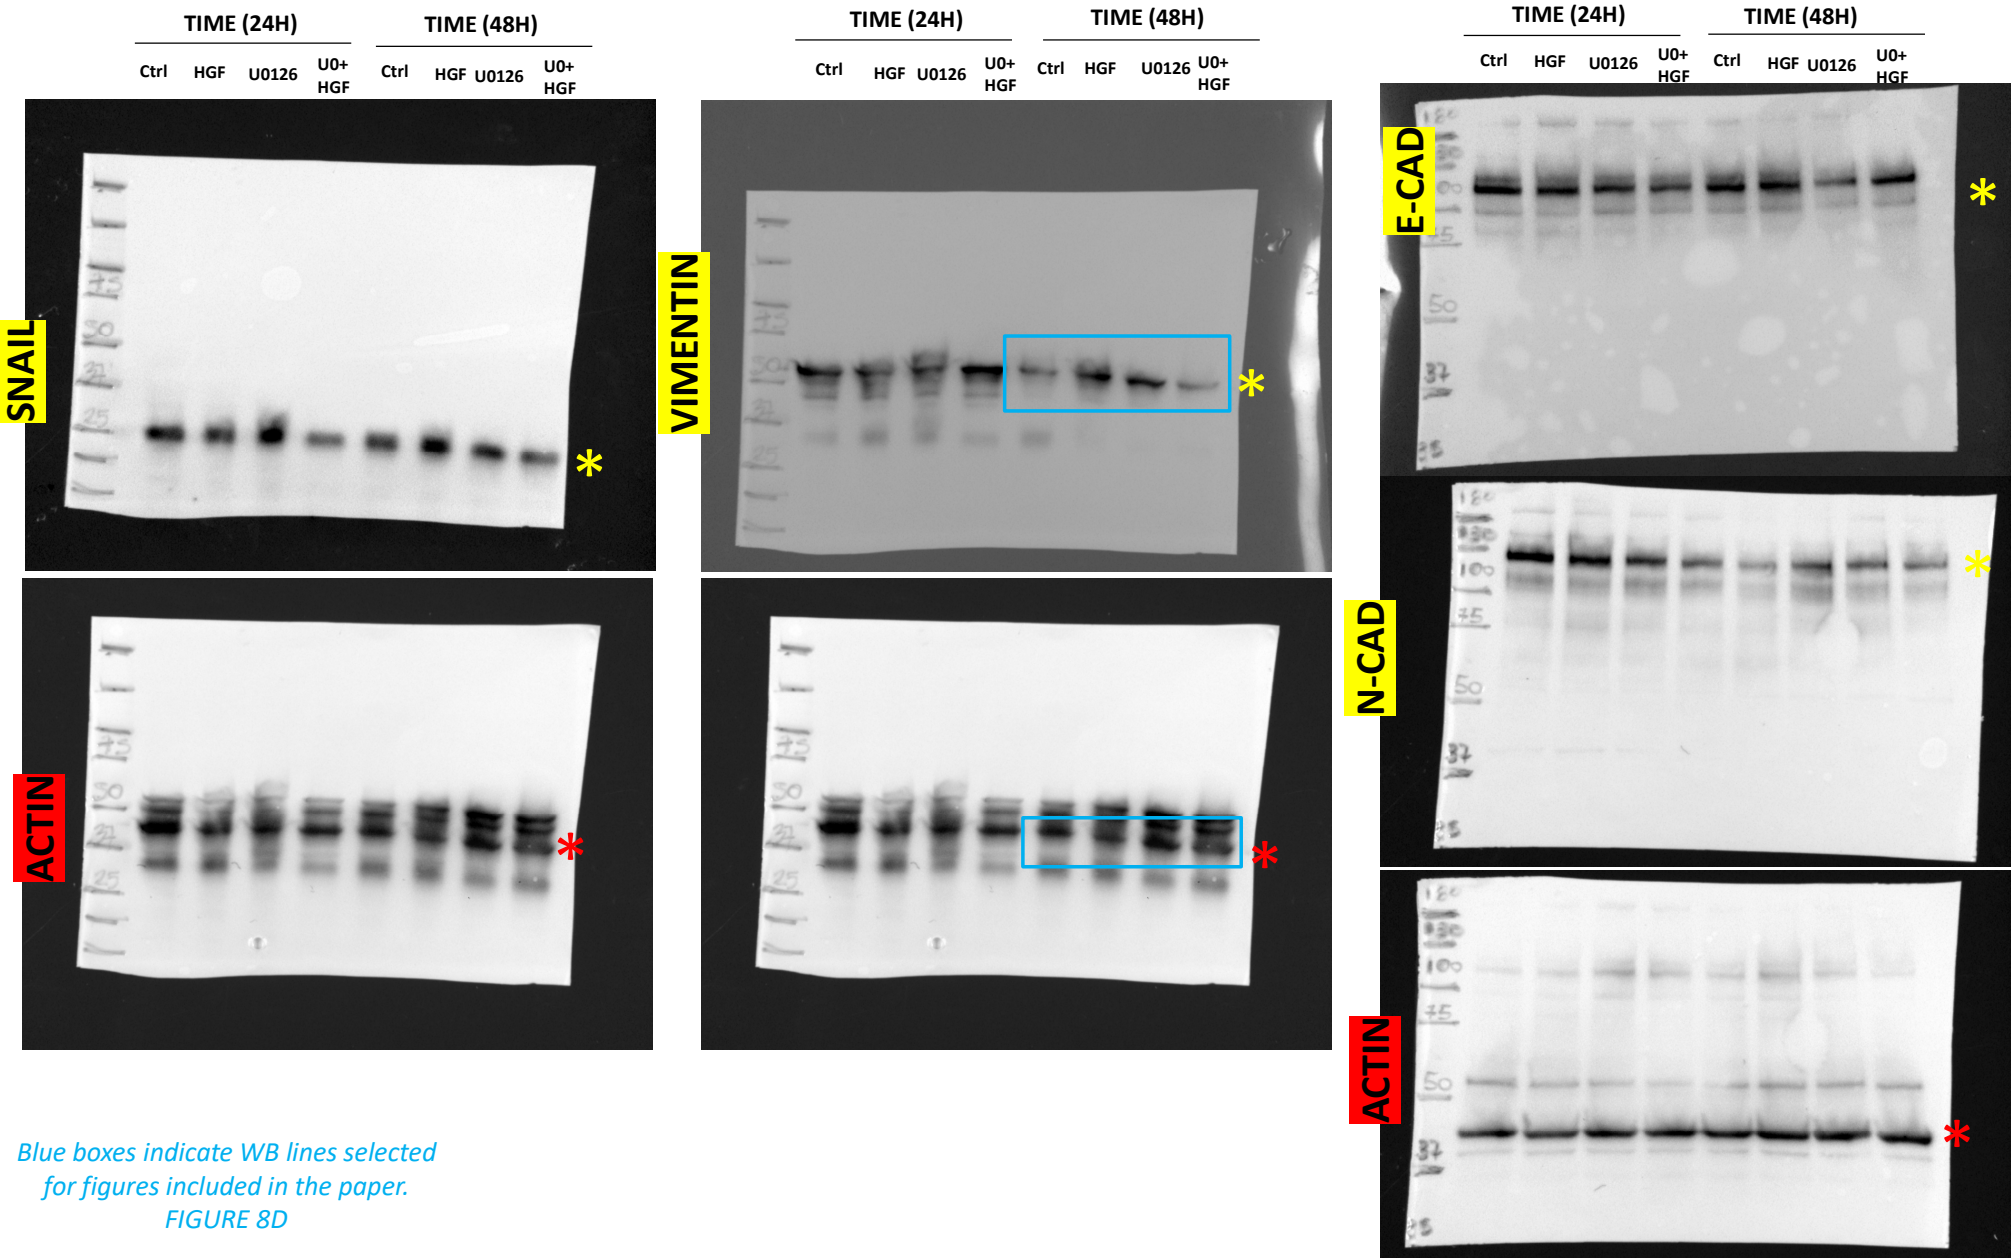



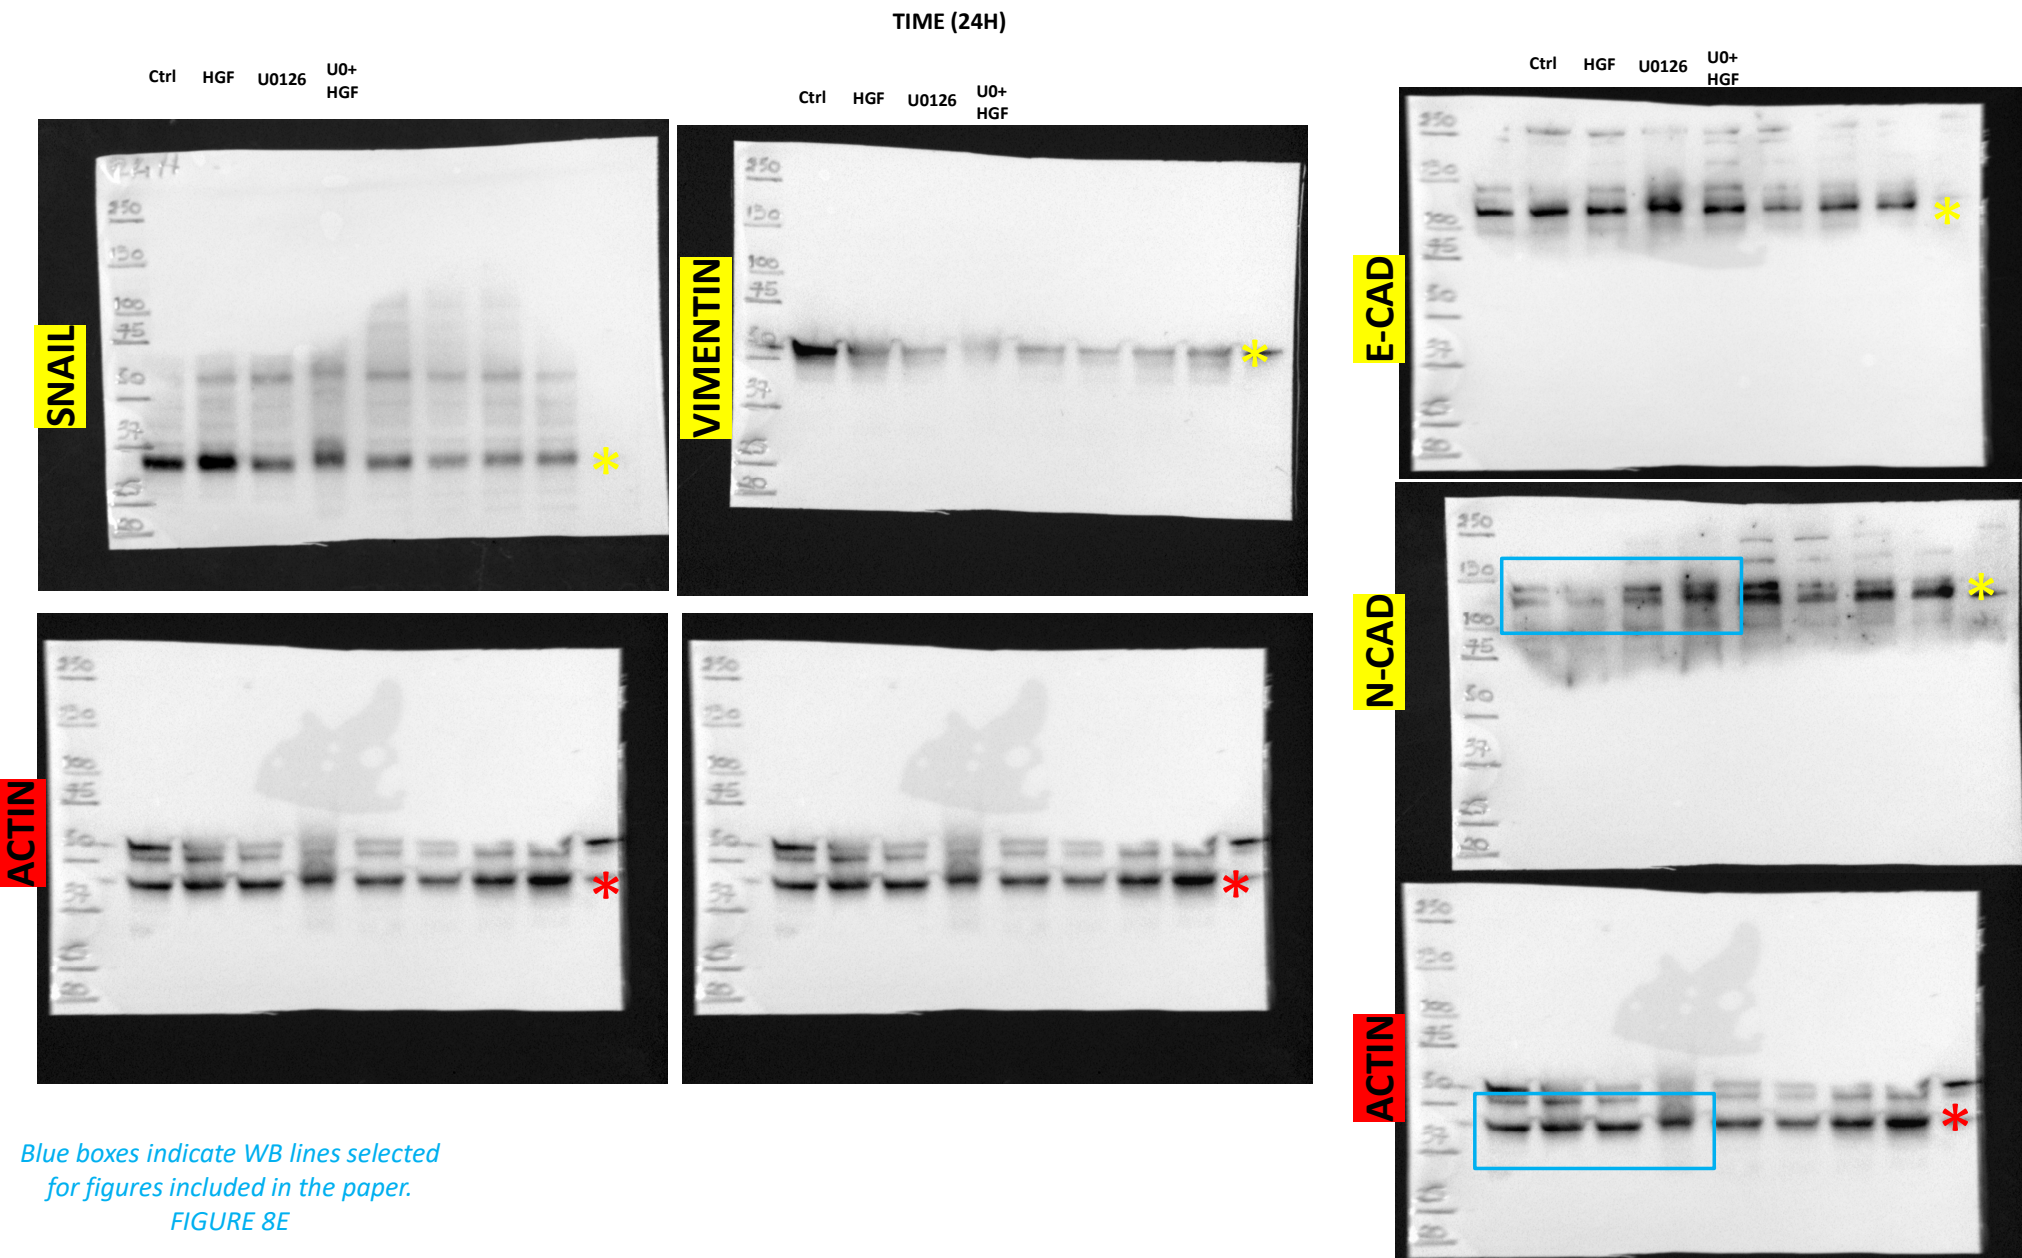

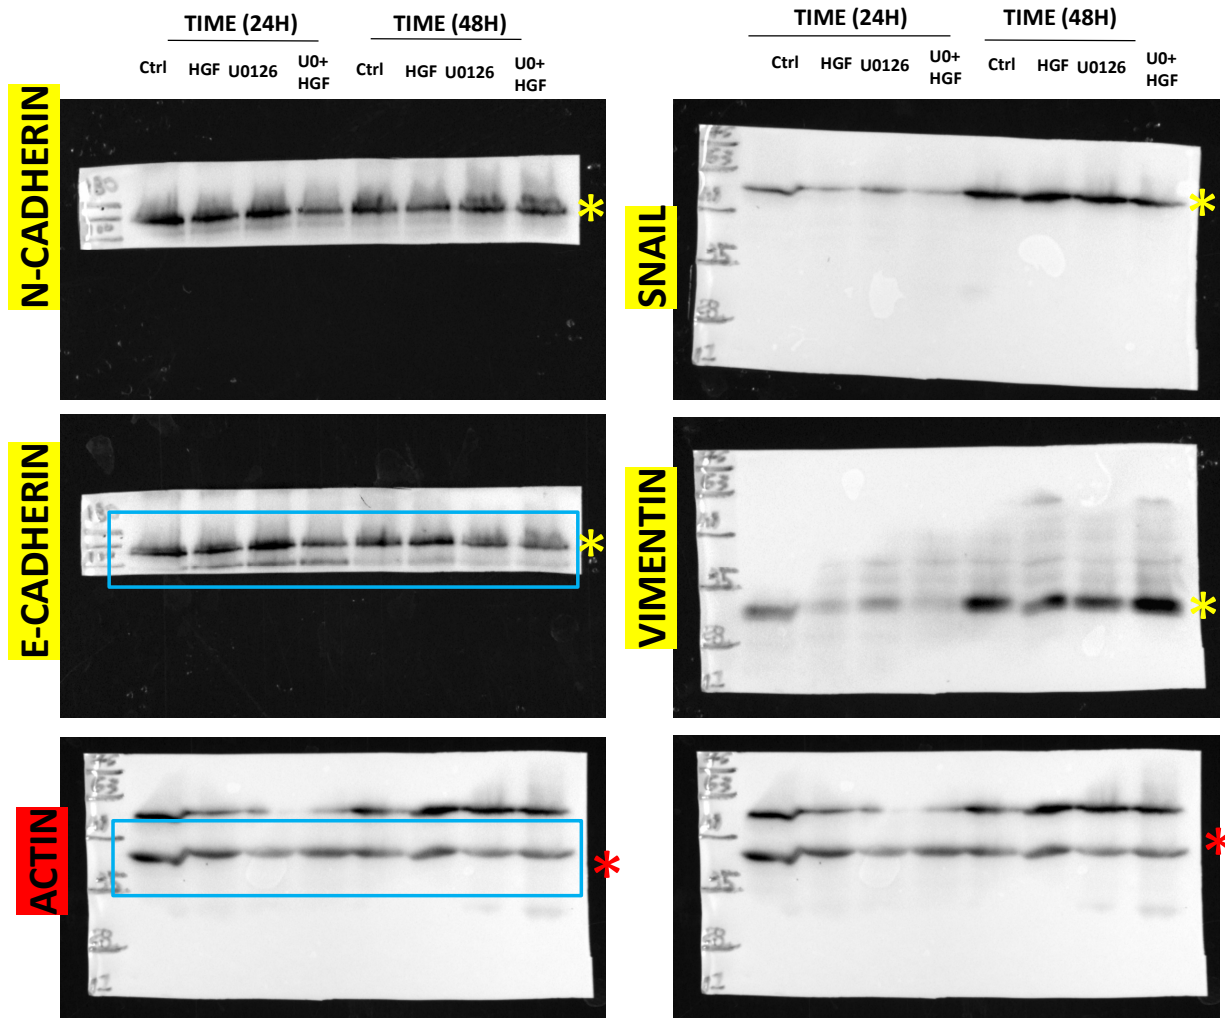

Blue boxes indicate WB lines selected  
for figures included in the paper.  
FIGURES 8 G, 8H

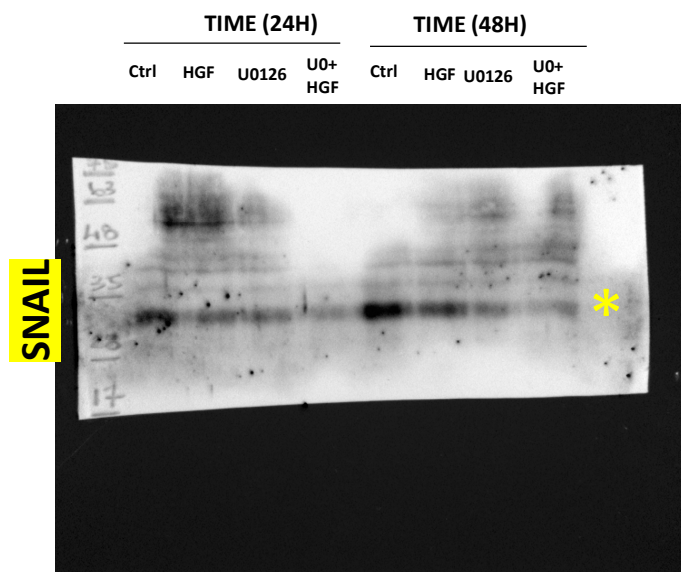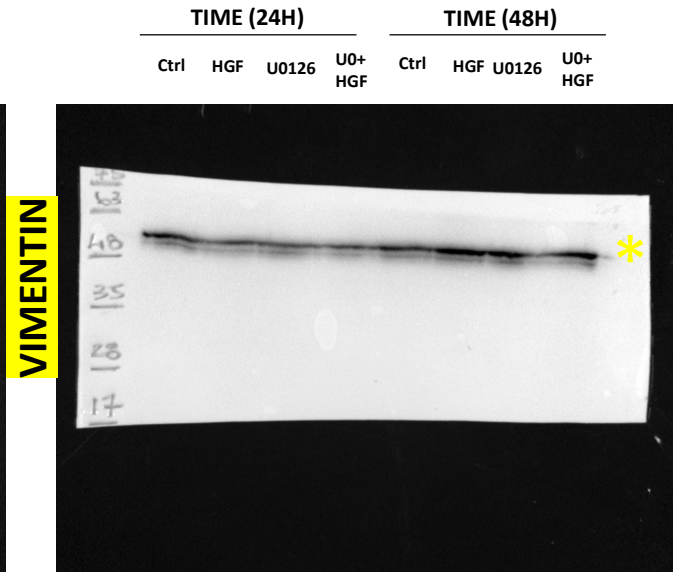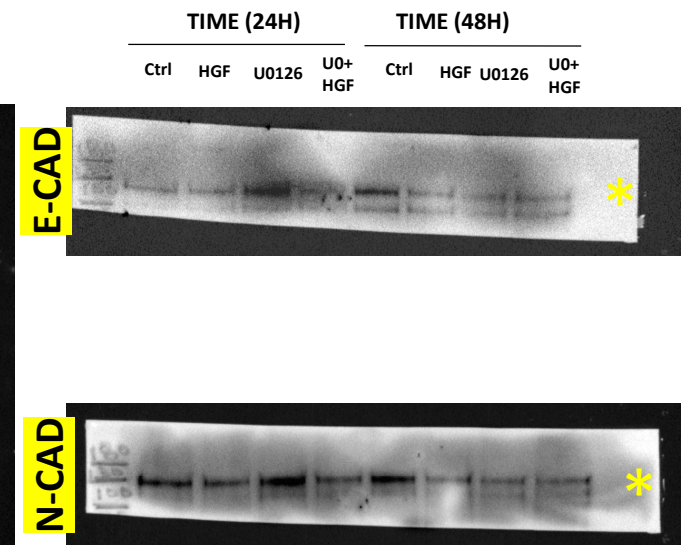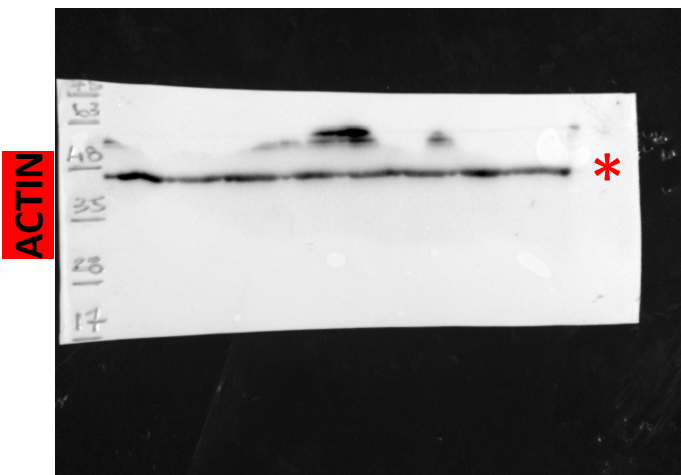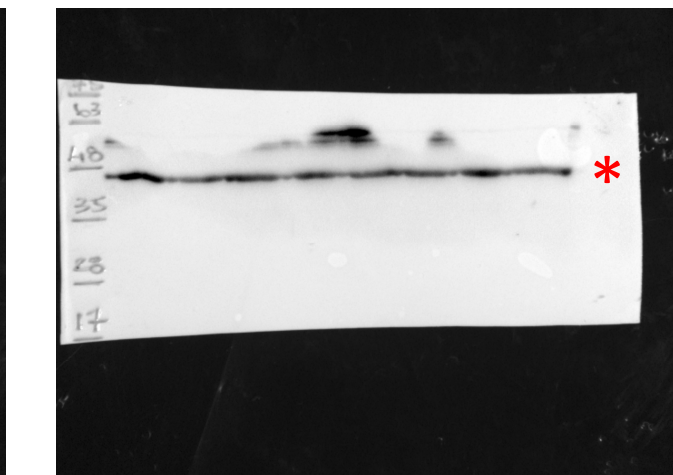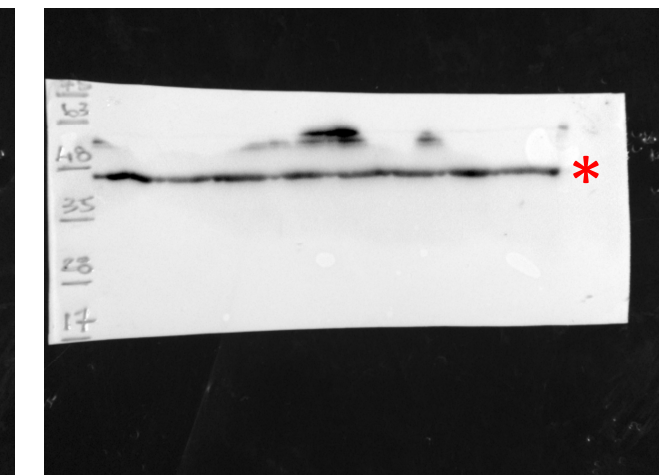

*These blots are relative to results presented in FIGURE 8*



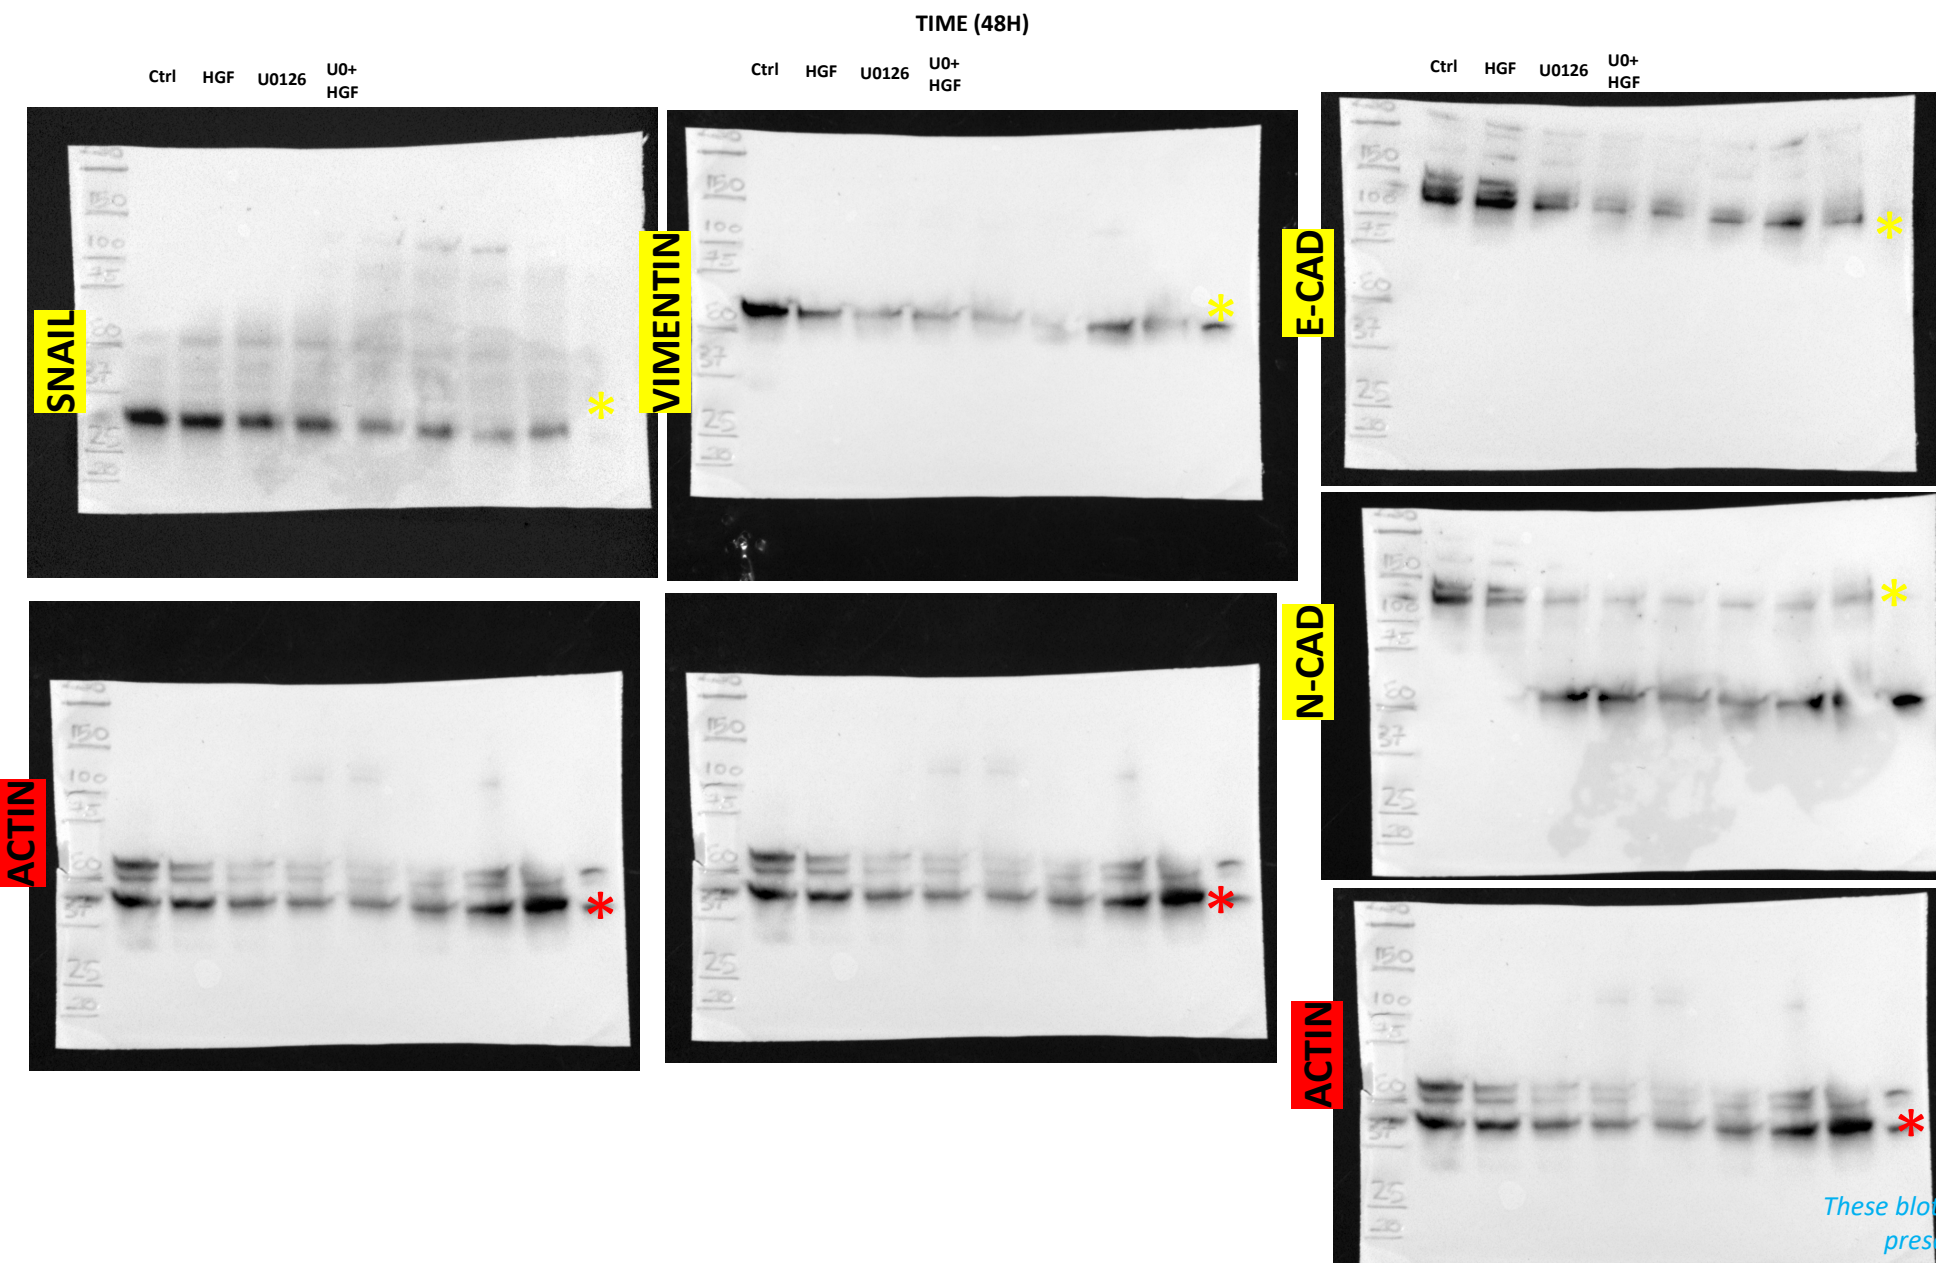



TIME (48H)

Ctrl HGF U0126 U0+  
HGF

SNAIL

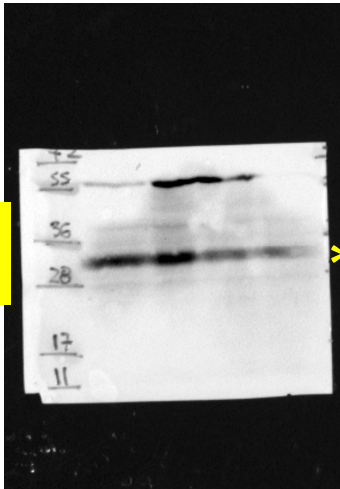

VIMENTIN

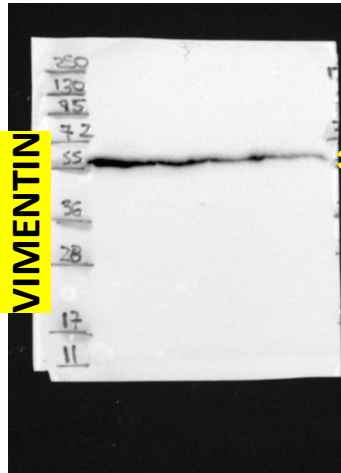

E-CADHERIN

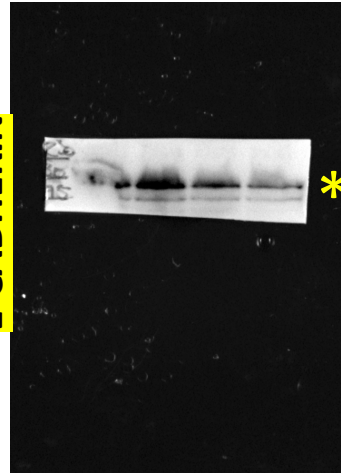

N-CADHERIN

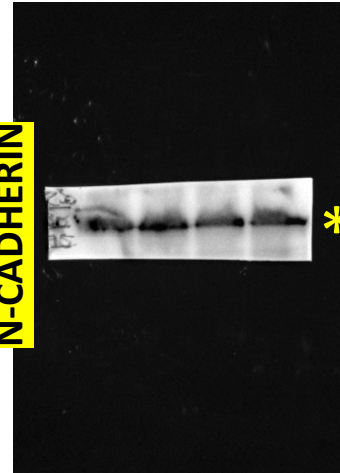

ACTIN

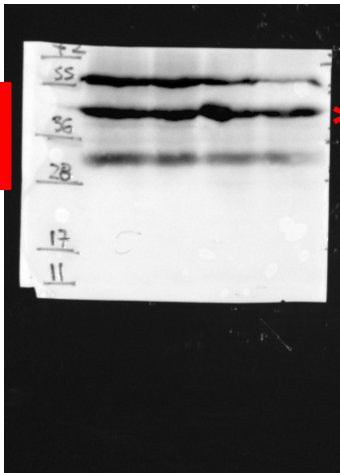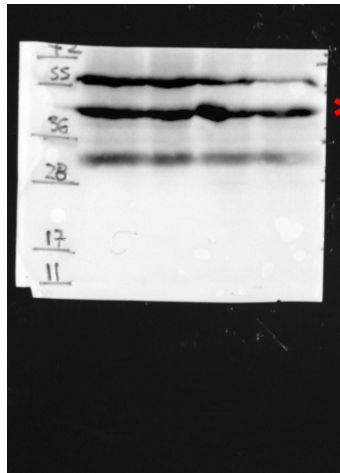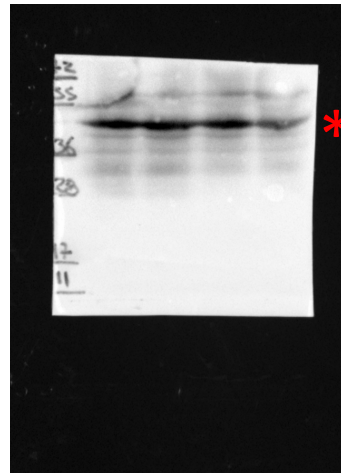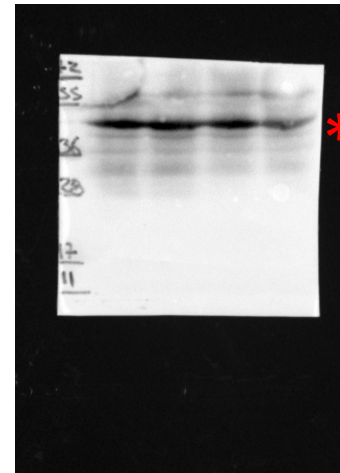

*These blots are relative to results  
presented in FIGURE 8*

TIME (24H)

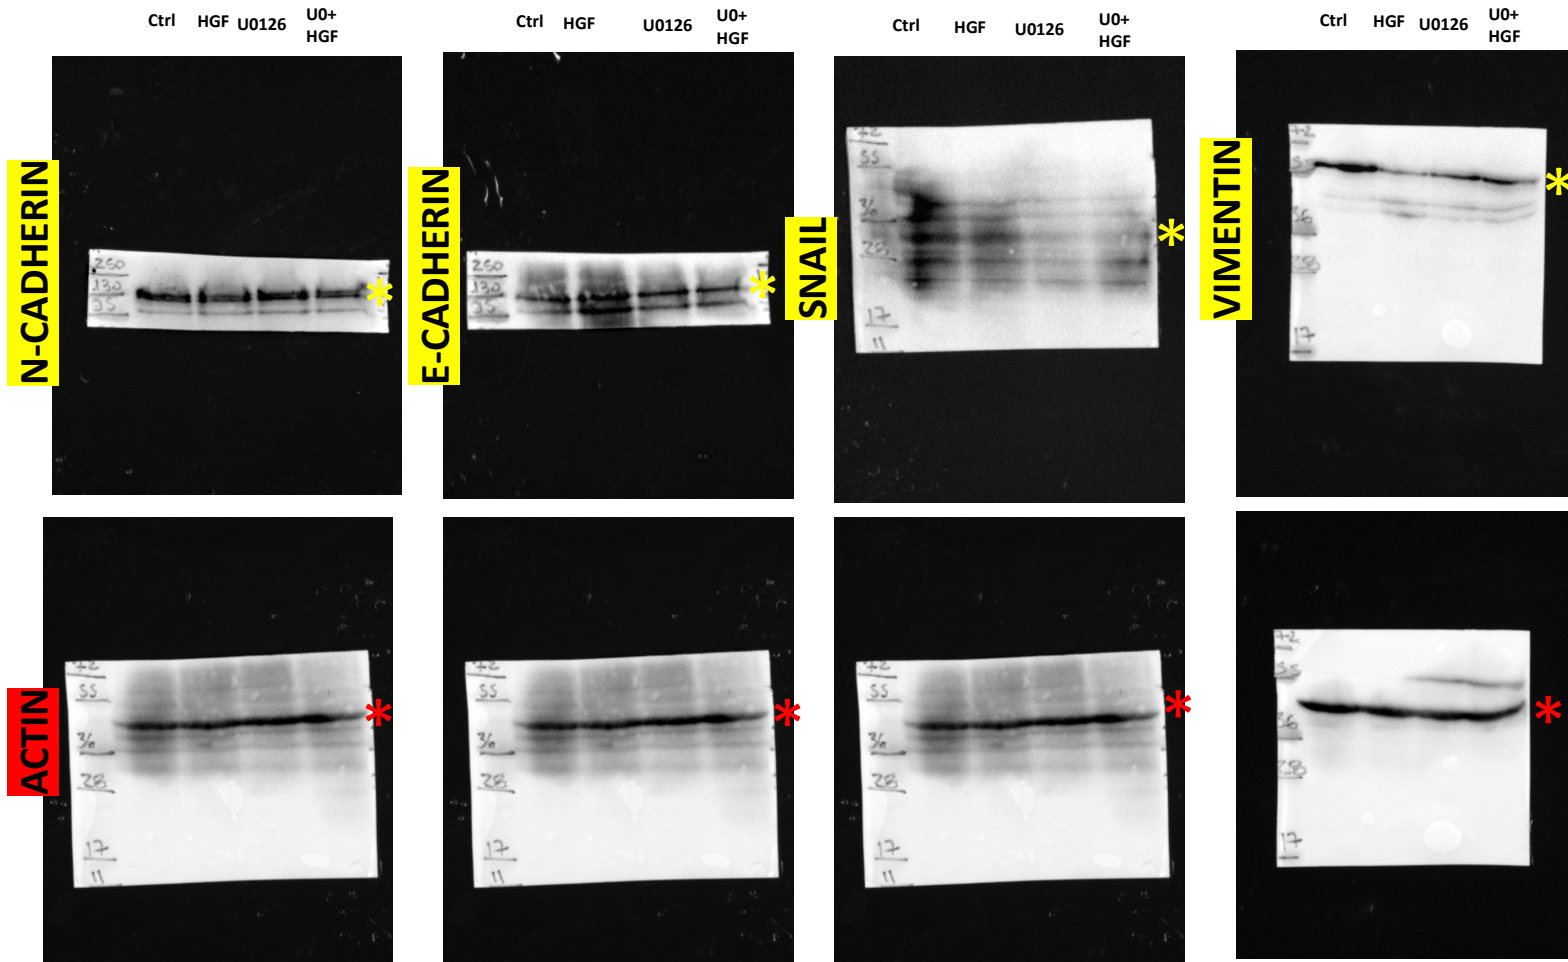

*These blots are relative to results presented in FIGURE 8*

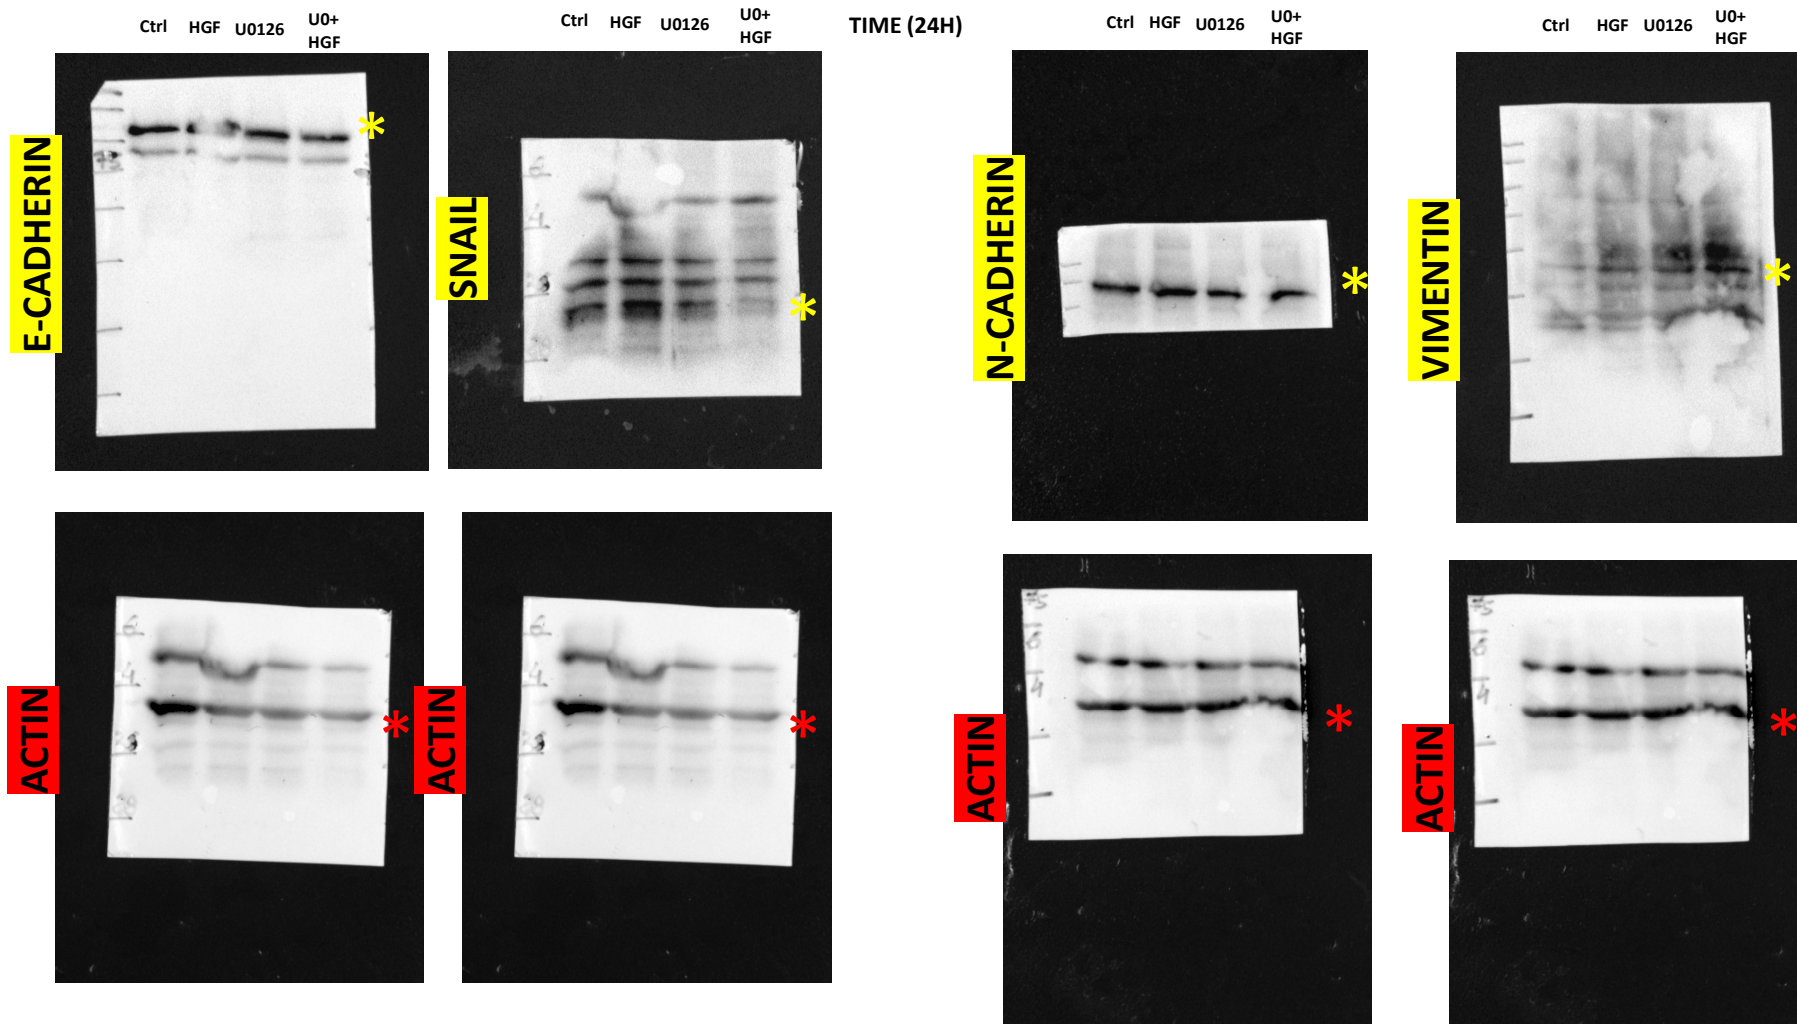

*These blots are relative to results  
presented in FIGURE 8*

TIME (24H)

Ctrl HGF U0126 U0+  
HGF

Ctrl HGF U0126 U0+  
HGF

SNAIL

N-CADHERIN

ACTIN

ACTIN

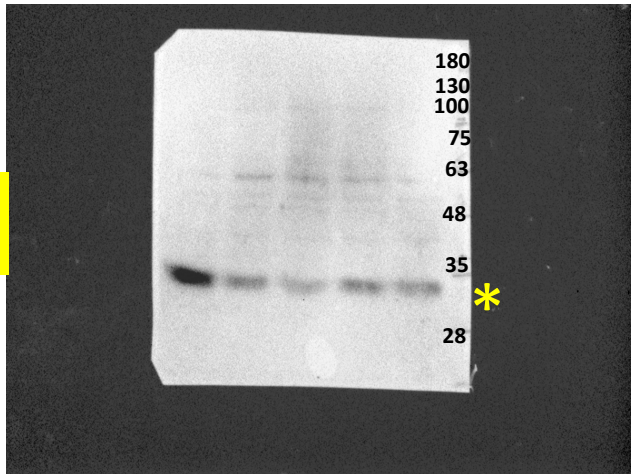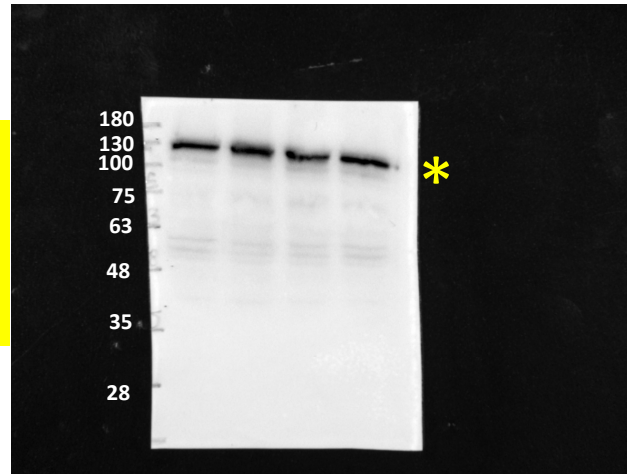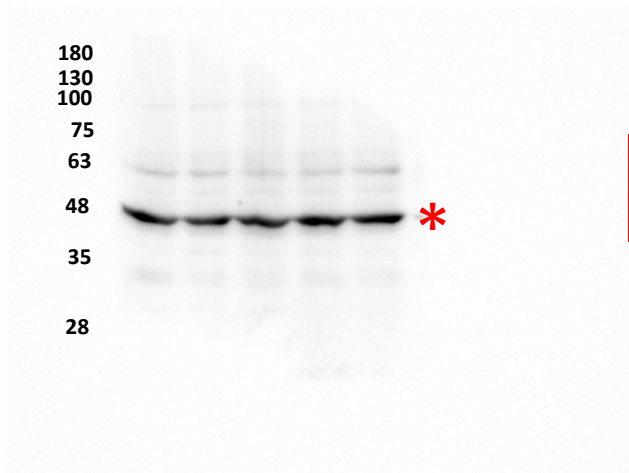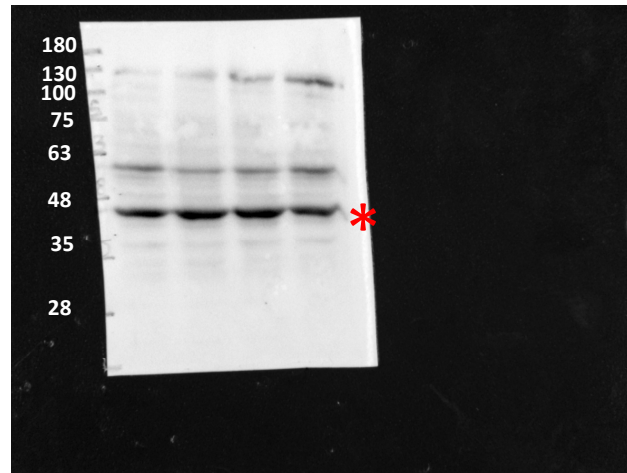

*These blots are relative to results  
presented in FIGURE 8*



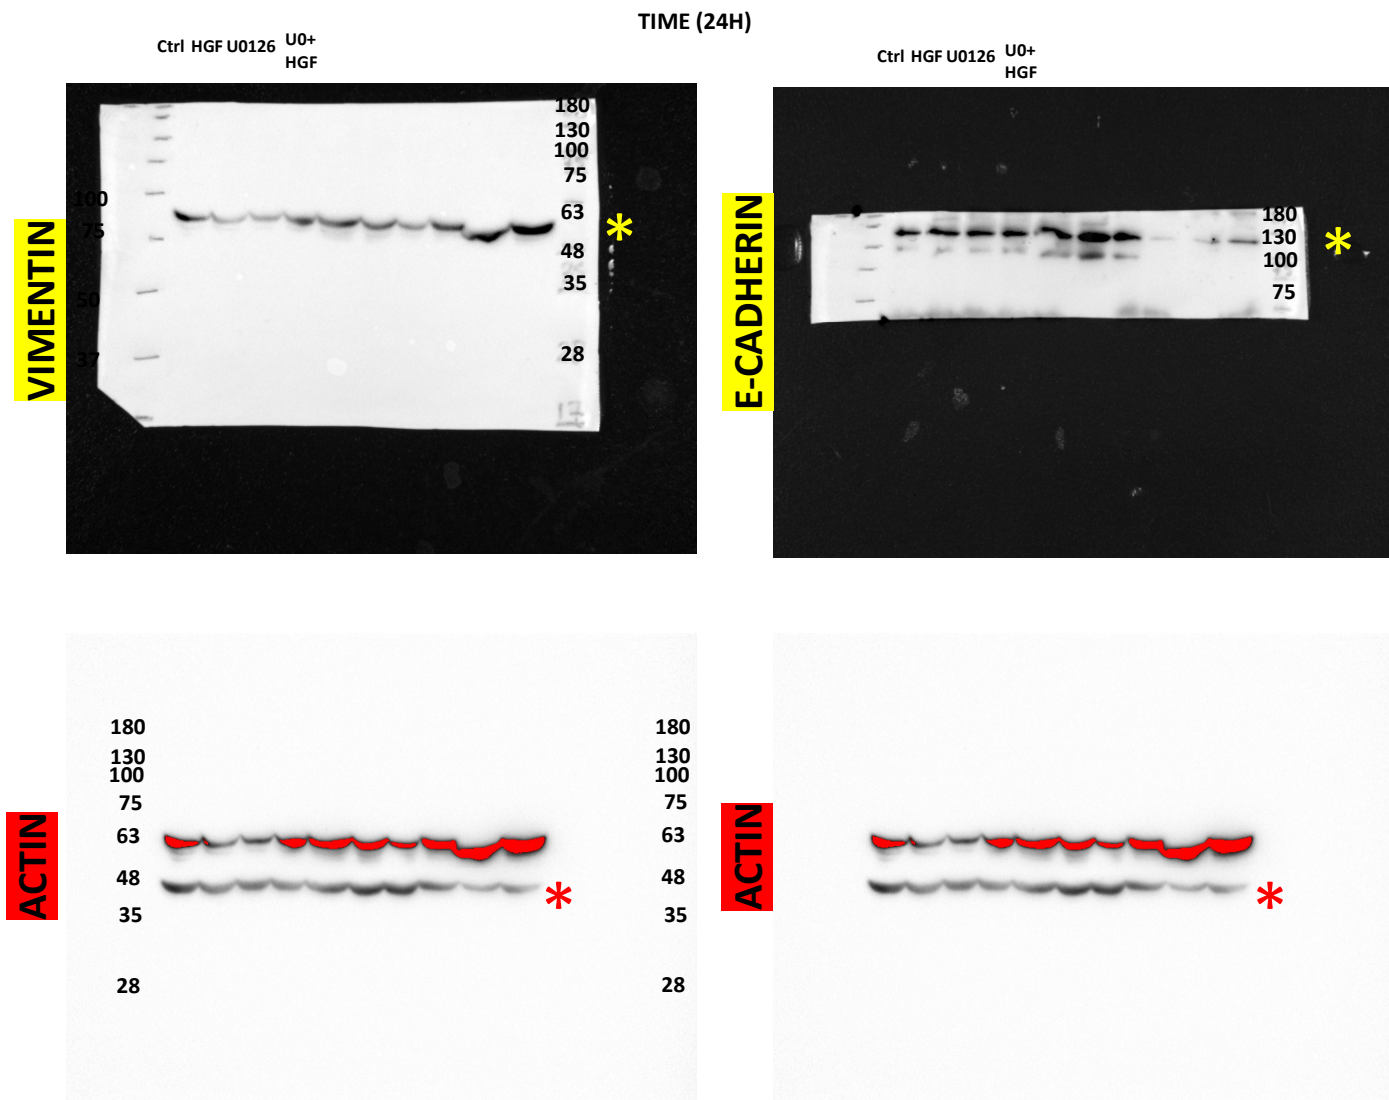

*These blots are relative to results  
presented in FIGURE 8*

pERK

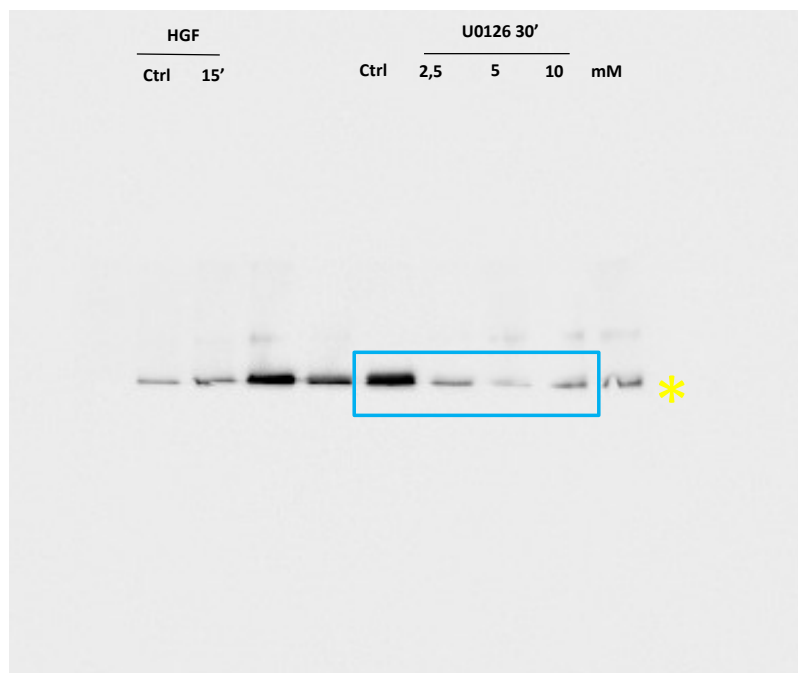

tERK

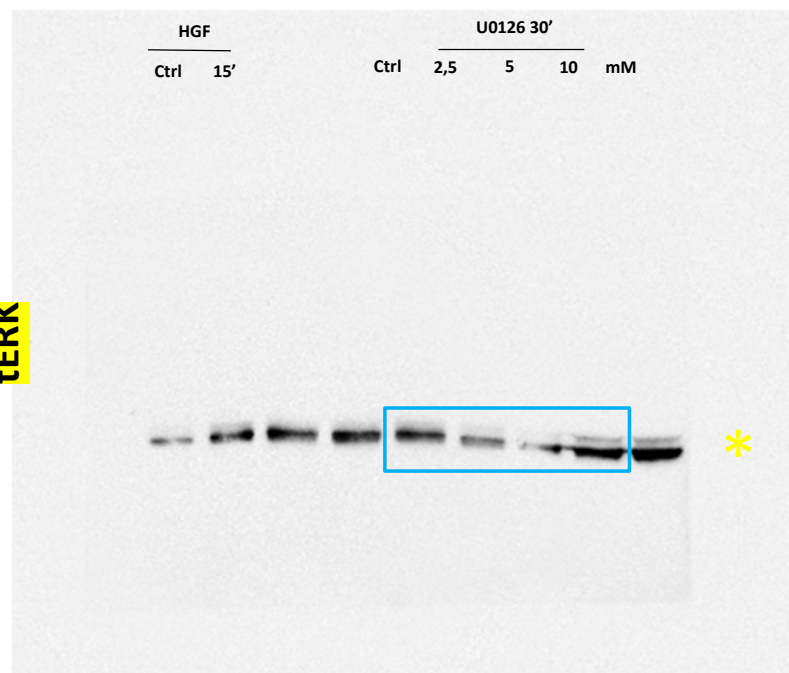

STAIN FREE  
BLOT

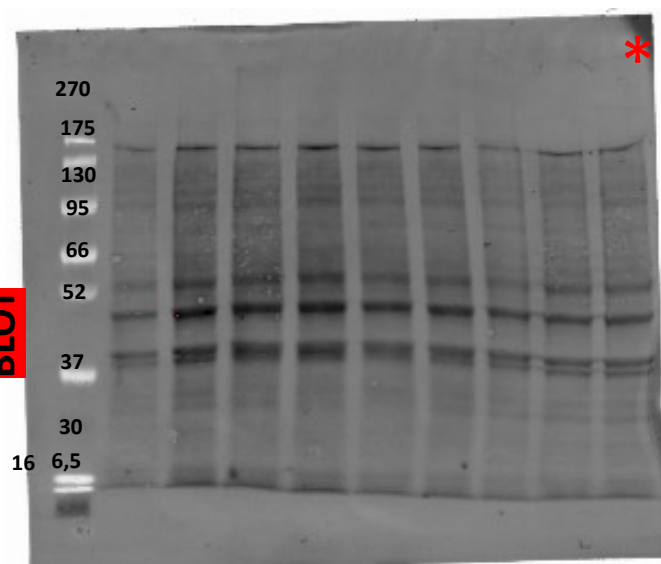

STAIN FREE  
BLOT

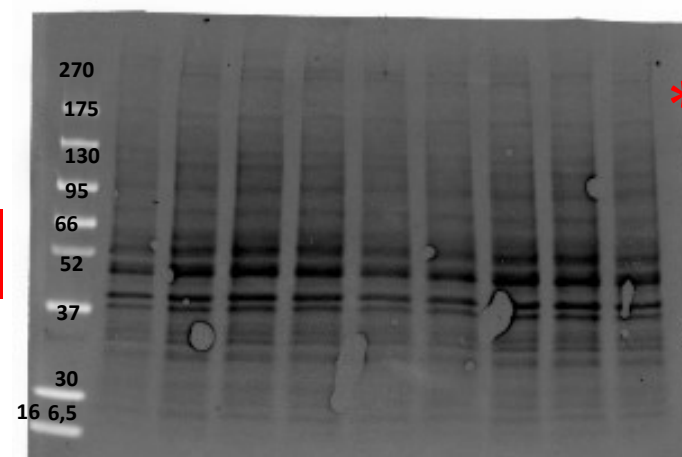

Blue boxes indicate WB lines selected  
for figures included in the paper.  
Figure S1
