# Supplementary material for: ERK Signaling Pathway Is Constitutively Active in NT2D1 Non-Seminoma Cells and Its Inhibition Impairs Basal and HGF-Activated Cell Proliferation
Source: MDPI journal article supplement (doi:10.3390/biomedicines11071894), 2023-07-04
Supplement: s1 [file s1]

Figure S.2. Cell cycle analysis of T0 and 48 h cultured cells with or without UO126.

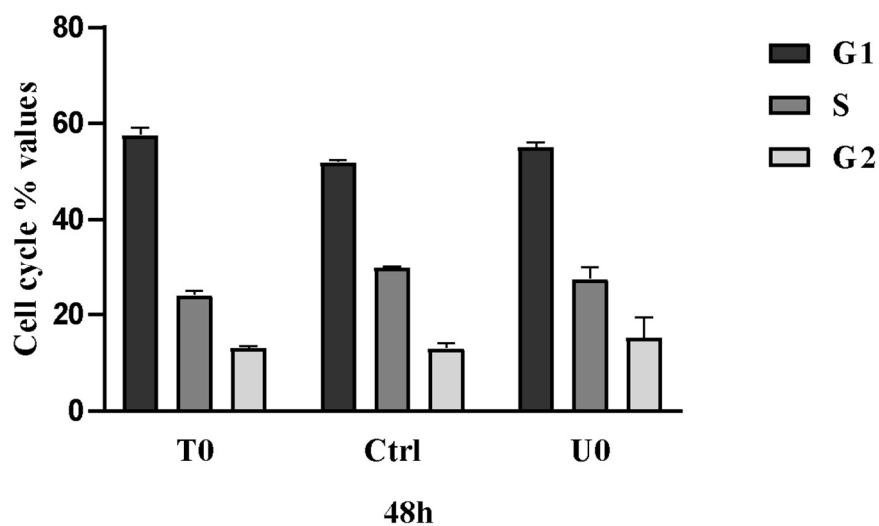

**Figure S.2.** Graphical representation of cell cycle analysis on NT2D1 cell cultured for 48 h with or without UO126 inhibitor, illustrating cell % for each cell cycle phase in all the experimental conditions reported in the respective graph  $\pm$  S.E.
